1 **A common human *MLKL* polymorphism confers resistance to negative regulation by**  
2 **phosphorylation**

3 Sarah E. Garnish<sup>1 2</sup>, Katherine R. Martin<sup>1 2</sup>, Maria Kauppi<sup>1 2</sup>, Victoria Jackson<sup>1</sup>, Rebecca  
4 Ambrose<sup>3 4</sup>, Vik Ven Eng<sup>3 5</sup>, Shene Chiou<sup>1 2</sup>, Yanxiang Meng<sup>1 2</sup>, Daniel Frank<sup>1</sup>, Emma C. Tovey  
5 Crutchfield<sup>1 6</sup>, Komal M. Patel<sup>1</sup>, Annette V. Jacobsen<sup>1 2</sup>, Georgia K. Atkin-Smith<sup>1 2</sup> Ladina Di  
6 Rago<sup>1 2</sup>, Marcel Doerflinger<sup>1 2</sup>, Christopher R. Horne<sup>1 2</sup>, Cathrine Hall<sup>1</sup>, Samuel N. Young<sup>1</sup>, Vicki  
7 Athanasopoulos<sup>7</sup>, Carola G. Vinuesa<sup>7</sup>, Kate E. Lawlor<sup>3 4</sup>, Ian P. Wicks<sup>1 2</sup>, Gregor Ebert<sup>8</sup> Ashley P.  
8 Ng<sup>1 9</sup>, Charlotte A. Slade<sup>1 2 10</sup>, Jaclyn S. Pearson<sup>3 4 5</sup>, Andre L. Samson<sup>1 2</sup>, John Silke<sup>1 2</sup>, James M.  
9 Murphy<sup>1 2</sup> and Joanne M. Hildebrand<sup>1 2 \*</sup>

- 10 1. The Walter and Eliza Hall Institute, Parkville, VIC, 3052, Australia  
11 2. University of Melbourne, Department of Medical Biology, Parkville, 3052, Australia  
12 3. Centre for Innate Immunity and Infectious Diseases, Hudson Institute of Medical Research,  
13 Clayton, VIC, 3168, Australia  
14 4. Department of Molecular and Translational Science, Monash University, Clayton, VIC, 3168,  
15 Australia  
16 5. Department of Microbiology, Monash University, Clayton, 3168, VIC, Australia  
17 6. University of Melbourne, Faculty of Medicine, Dentistry and Health Sciences, Parkville, 3052,  
18 Australia  
19 7. Department of Immunology and Infection, John Curtin School of Medical Research, Australian  
20 National University, ACT, Australia  
21 8. Institute of Virology, Technical University of Munich/Helmholtz Munich, Munich, Germany  
22 9. Clinical Haematology Department, The Royal Melbourne Hospital and Peter MacCallum  
23 Cancer Centre, Parkville, 3052, Australia

24 10. Department of Clinical Immunology & Allergy, Royal Melbourne Hospital, Parkville, VIC,

25 3052, Australia

26 \* To whom correspondence may be addressed- [jhildebrand@wehi.edu.au](mailto:jhildebrand@wehi.edu.au)

27

28 **ABSTRACT**

29 Across the globe, 2-3% of humans carry the *p.Ser132Pro* single nucleotide polymorphism in  
30 *MLKL*, the terminal effector protein of the inflammatory form of programmed cell death,  
31 necroptosis. We show that this substitution confers a gain in necroptotic function in human cells,  
32 with more rapid accumulation of activated *MLKL*<sup>S132P</sup> in biological membranes and *MLKL*<sup>S132P</sup>  
33 overriding pharmacological and endogenous inhibition of *MLKL*. In mouse cells, the equivalent  
34 *Mkl1 S131P* mutation confers a gene dosage dependent reduction in sensitivity to TNF-induced  
35 necroptosis in both hematopoietic and non-hematopoietic cells, but enhanced sensitivity to IFN- $\beta$   
36 induced death in non-hematopoietic cells. *In vivo*, *Mkl1*<sup>S131P</sup> homozygosity reduces the capacity to  
37 clear *Salmonella* from major organs and retards recovery of hematopoietic stem cells. Thus, by  
38 dysregulating necroptosis, the S131P substitution impairs the return to homeostasis after systemic  
39 challenge. Present day carriers of the *MLKL S132P* polymorphism may be the key to understanding  
40 how *MLKL* and necroptosis modulate the progression of complex polygenic human disease.

## 41 INTRODUCTION

42 Necroptosis is a caspase independent form of programmed cell death that originated as a defense  
43 against pathogens <sup>1, 2, 3, 4, 5</sup>. Highly inflammatory in nature, necroptosis results in the  
44 permeabilization of biological membranes and the release of cytokines, nucleic acids, and  
45 intracellular proteins into the extracellular space <sup>6</sup>. Necroptosis is induced by danger- or pathogen-  
46 associated molecular patterns that signal via transmembrane receptors or intracellular pattern  
47 recognition receptors <sup>7, 8, 9, 10, 11</sup>. Of the various initiating stimuli, the most well studied necroptotic  
48 pathway is downstream of tumor necrosis factor receptor 1 (TNFR1)<sup>12</sup>. In physiological contexts  
49 that favor low cellular inhibitor of apoptosis protein 1 (cIAP1) and caspase-8 activity, TNFR1  
50 signals culminate in the formation of a high molecular weight platform called the necrosome that  
51 is nucleated by heterooligomeric RIPK1 and RIPK3 <sup>13, 14, 15</sup>. Here, the terminal executioner protein,  
52 MLKL, is phosphorylated and activated by its upstream kinase, RIPK3 <sup>16, 17, 18</sup>. Following  
53 phosphorylation, MLKL dissociates from RIPK3, oligomerizes, and is trafficked to biological  
54 membranes where it interacts with Phosphatidylinositol Phosphates (or ‘PIPs’) <sup>19, 20, 21, 22, 23, 24, 25,</sup>  
55 <sup>26, 27, 28, 29</sup>. In human cells, association of activated MLKL oligomers with biological membranes  
56 can be inhibited by the synthetic compound necrosulfonamide <sup>16, 22, 28</sup> or inhibitory  
57 phosphorylation of MLKL at Serine 83 <sup>30</sup>. Pharmacological or mutation driven disruption at any  
58 major necroptotic signaling checkpoint compromises a cell’s capacity to execute necroptosis.

59 In mouse studies, MLKL-mediated cell death has been implicated as a driver or suppressor of  
60 diseases spanning almost all physiological systems depending on the pathological context. The  
61 generation of *Mkl* gene knockout (*Mkl*<sup>-/-</sup>), knock-in and conditional knockout mouse models have  
62 enabled the role of necroptosis in infectious and non-infectious challenges to be dissected in  
63 physiological detail <sup>31</sup>. Interestingly, genetic deletion of *Mkl* has no overt developmental or

64 homeostatic effects, with the exception of a reduction in age-related sterile inflammation in female  
65 mice<sup>18, 32, 33</sup>. This is in direct contrast with two mouse models harboring *Mkl1* point mutations that  
66 dysregulate MLKL activation, *Mkl1*<sup>D139V</sup> and *Mkl1*<sup>S83G</sup>, which exhibit early neonatal death and  
67 severe inflammatory phenotypes<sup>30, 34</sup>. Altogether, these observations suggest that while  
68 constitutive absence of MLKL-mediated death is benign, imbalanced execution of necroptotic cell  
69 death is deleterious.

70 Consistent with this notion, more than 20 unique disease-associated human germline gene variants  
71 in the core necroptotic machinery, encompassing *RIPK1*, *RIPK3*, *MLKL*, have been identified<sup>35</sup>,  
72<sup>36</sup>. In one family, a haplotype including a rare *MLKL* loss-of-function gene variant  
73 (*p.Asp369GlufsTer22*, rs561839347) is associated with a severe and progressive novel  
74 neurogenerative spectrum disorder characterized by global brain atrophy<sup>37</sup>. A more frequent  
75 *MLKL* loss-of-function gene variant (*p.Gln48Ter*, rs763812068) was found to be >20 fold enriched  
76 in a cohort of Hong Kong Chinese patients suffering from Alzheimer's disease<sup>38</sup> and common  
77 variants that cluster around the *MLKL* brace region were shown to be enriched *in trans* in a cohort  
78 of chronic recurrent multifocal osteomyelitis patients<sup>34</sup>. More recently, a hypomorphic *MLKL*  
79 missense gene variant (*p.G316D*, rs375490660) was reported to be associated with Maturity Onset  
80 Diabetes of the Young<sup>39</sup>.

81 Here we present the cellular and physiological characterization of a serine to proline missense  
82 polymorphism at *MLKL* amino acid 132 (*p.Ser132Pro*; *S132P*). The *S132P* polymorphism is the  
83 third most frequent human *MLKL* missense coding variant in the gnomAD database; a large  
84 repository of whole genome and exome sequence data from humans of diverse ancestry<sup>40</sup>. To  
85 examine the potential human disease-causing effects of this *MLKL* variant, we exogenously  
86 expressed *MLKL*<sup>S132P</sup> in human cell lines and introduced the mouse counterpart variant (*Mkl1*<sup>S131P</sup>)

87 into a genetically modified mouse model, revealing that this polymorphism confers MLKL gain-  
88 of-function in a cell- and stimulus-dependent manner. This MLKL gain-of-function manifests in  
89 *in vivo* changes to the immune response, impaired bacterial clearance, and defective emergency  
90 hematopoiesis. These observed phenotypes provide important insights into how this highly  
91 frequent human *MLKL S132P* polymorphism may contribute to the progression of complex  
92 disease.

93

## 94 **RESULTS**

### 95 **Carriers of the *p.Ser132Pro* polymorphism exhibit diverse inflammatory disease profiles.**

96 With a global minor allele frequency (MAF) of 0.0138, the *MLKL S132P* (rs35589326)  
97 polymorphism is predicted to be carried by 2-3% of the human population. It has not been detected  
98 in individuals assigned East Asian ancestry, is rare in individuals of African or Latino/Admixed  
99 American ancestry and is carried by an estimated 6-7% of individuals of Ashkenazi Jewish  
100 ancestry (MAF 0.0315) (www.gnomAD.com, February 2023) (**Figure 1A**). Notably, Ser132 is  
101 highly conserved across species (**Figure 1B**).

102 Two heterozygous carriers of the *MLKL S132P* polymorphism were identified in an Australian  
103 registry of patients suffering from immune related disease. Patient 1, a female of South American  
104 heritage, was diagnosed with SAPHO (synovitis, acne, pustulosis, hyperostosis, osteitis) syndrome  
105 (inheritance chart unavailable). Patient 2, a female of European heritage, was diagnosed with  
106 systemic IgG4 disease (**Supplementary Figure 1A**). Both patients have one or more immediate  
107 family members carrying the *MLKL S132P* polymorphism who were also diagnosed with  
108 inflammatory diseases in early adulthood. Following whole genome sequencing, Patient 1 was

109 found to exhibit a region of loss of heterozygosity (5:96031569 – 5:96364063) which covers *CAST*,  
110 *ERAP1*, *ERAP2* and *LNPEP*. These genes have been previously associated with inflammatory  
111 disease<sup>41, 42, 43, 44, 45</sup>. Patient 2 does not carry any other predicted pathogenic gene variants. Primary  
112 peripheral blood mononuclear cells (PBMCs) isolated from patient 2 showed reduced MLKL  
113 protein levels, accompanied by a nominal increase in pro-inflammatory cytokine production in  
114 response to the Toll-like receptor (TLR) agonists, lipopolysaccharide and poly I:C, relative to age  
115 and sex matched healthy donor PBMCs not carrying the *MLKL S132P* polymorphism  
116 (**Supplementary Figure 1B, C**).

117

### 118 ***MLKL*<sup>S132P</sup> confers resistance to chemical and natural regulatory inhibition.**

119 To examine any changes to MLKL function conferred by this common polymorphism, we stably  
120 transduced parental wild-type (WT) and *MLKL*<sup>-/-</sup> versions of the human colonic epithelial cell line  
121 HT29 with doxycycline inducible *MLKL*<sup>WT</sup> and *MLKL*<sup>S132P</sup> gene expression constructs. We also  
122 included the T357/S358 phosphosite mutant *MLKL*<sup>TSEE</sup>, previously shown to be inactive<sup>20, 46</sup>, as a  
123 negative control for necroptosis induction. Cells expressing *MLKL*<sup>S132P</sup> died with similar kinetics  
124 to *MLKL*<sup>WT</sup> following necroptotic stimulation (TNF, Smac mimetic compound A and pan-caspase  
125 inhibitor IDN-665; TSI) and, as expected, *MLKL*<sup>TSEE</sup> reconstituted cells were resistant to  
126 necroptotic cell death (**Figure 1C, Supplementary Figure 1D, E**). Interestingly, in the presence  
127 of the MLKL inhibitor necrosulfonamide (NSA), TSI-stimulated cells expressing *MLKL*<sup>S132P</sup>  
128 exhibited higher levels of cell death than their *MLKL*<sup>WT</sup> counterparts at later timepoints (**Figure**  
129 **1C, Supplementary Figure 1D**). We termed this override of MLKL inhibition ‘breakthrough’  
130 cell death. Breakthrough death also occurred when *MLKL*<sup>S132P</sup> was co-expressed with endogenous

131 *MLKL* and increased when *MLKL*<sup>S132P</sup> expression was augmented by higher doses of doxycycline  
132 **(Figure 1C, Supplementary Figure 1D, E)**. We also observed breakthrough death in both wild-  
133 type and *MLKL*<sup>-/-</sup> forms of the human monocytic cell line U937, indicating this is not a cell type  
134 specific phenomenon **(Supplementary Figure 1F, G)**. Breakthrough death was neither due to  
135 differences in *MLKL* expression, nor changes in *MLKL* phosphorylation (T357/S358), because  
136 both were equivalent between *MLKL*<sup>WT</sup> and *MLKL*<sup>S132P</sup> reconstituted cells **(Figure 1D,**  
137 **Supplementary Figure 1H, I)**. Instead, cellular fractionation experiments suggest that  
138 breakthrough death was likely due to enhanced association of *MLKL*<sup>S132P</sup> with biological  
139 membranes **(Figure 1E, Supplementary Figure 1J)**.

140 The small molecule inhibitor, necrosulfonamide (NSA), blocks human *MLKL* activity through  
141 covalent modification of Cysteine 86, located in the *MLKL* four helix-bundle, executioner domain  
142 **(Figure 1F)**<sup>16,47</sup>. Recently, it was discovered that *MLKL* can be endogenously phosphorylated at  
143 the proximal residue, Serine 83, and this phosphorylation event plays a species conserved  
144 inhibitory role in both human (S83) and mouse (S82) **(Figure 1F)**<sup>30</sup>. Like NSA, phosphorylation  
145 of *MLKL* S83 does not alter the capacity of RIPK3 to phosphorylate *MLKL* at S357/T358 but  
146 prevents necroptosis by blocking the association of *MLKL* with cellular membranes<sup>30</sup>. To test  
147 whether phosphorylation at S83 is, like NSA, less effective at inhibiting *MLKL*<sup>S132P</sup> induced death,  
148 we created stable HT29 (*MLKL*<sup>-/-</sup> and wild-type) cell lines that exogenously express gene  
149 constructs encoding *MLKL*<sup>WT</sup>, *MLKL*<sup>S132P</sup>, *MLKL*<sup>S83D</sup> (phosphomimetic) and double mutant  
150 *MLKL*<sup>S83D,S132P</sup>. Consistent with recent studies<sup>30</sup>, the phosphomimetic mutation of S83, *MLKL*<sup>S83D</sup>,  
151 ablated the capacity of *MLKL* to execute necroptotic cell death **(Figure 1G)**. Also, as previously  
152 reported, the inhibitory effect of *MLKL*<sup>S83D</sup> overrode the activating effects of endogenous *MLKL*  
153 phosphorylation at Ser357/Thr358 **(Figure 1G, Supplementary Figure 1K, L)**. Exogenous



154 expression of *MLKL*<sup>S83D</sup> also reduced total levels of necroptotic cell death in the presence of  
155 endogenous *MLKL*, indicating that this S83 phosphomimetic acts in a dominant negative manner  
156 (**Supplementary Figure 1L**). Strikingly, combining the *MLKL*<sup>S132P</sup> and *MLKL*<sup>S83D</sup> substitutions  
157 to create the compound mutant *MLKL*<sup>S83D, S132P</sup> restored necroptotic cell death responsiveness,  
158 albeit with reduced kinetics and reduced maximal cell death when compared to *MLKL*<sup>S132P</sup> alone  
159 (**Figure 1G**). The *MLKL*<sup>S132P</sup> variant also partially overcomes the dominant negative effect of S83  
160 phosphomimetic mutation in cells that endogenously express wild-type *MLKL* (**Supplementary**  
161 **Figure 1L**).

162 To further dissect how the *MLKL*<sup>S132P</sup> substitution facilitates gain-of-function, we used liposome  
163 dye release assays to test the membrane damaging capacity of recombinant full-length *MLKL*<sup>WT</sup>,  
164 *MLKL*<sup>S132P</sup>, *MLKL*<sup>S83D</sup> and *MLKL*<sup>S83D, S132P</sup> expressed and purified from insect cells. We found  
165 that the membrane damaging capacity of recombinant *MLKL*<sup>S132P</sup> was increased, and *MLKL*<sup>S83D</sup>  
166 reduced, relative to *MLKL*<sup>WT</sup> (**Figure 1H**). Consistent with our observations in cells, the  
167 combination mutant *MLKL*<sup>S83D, S132P</sup> displayed a membrane damaging capacity greater than  
168 *MLKL*<sup>S83D</sup> alone but reduced in comparison to *MLKL*<sup>WT</sup> (**Figure 1H**). Our results suggest S132P  
169 promotes membrane association, and this is likely to contribute to the gain-of-function we  
170 observed *in vitro* under pharmacological and natural inhibition.

171 Given the clear gain-of-function conferred to *MLKL* in the context of simulated inhibitory  
172 phosphorylation (*MLKL*<sup>S83D, S132P</sup>), we questioned whether mutations that resemble this  
173 phosphomimetic mutant may occur naturally. According to the gnomAD database  
174 ([www.gnomAD.com](http://www.gnomAD.com), Jan 2023), no individuals have been recorded with a polymorphism that  
175 encodes the *p.Ser83Asp* (S83D) replacement. However, there are individuals that carry closely  
176 related changes, *p.Ser83Cys* (MAF 3.54e10<sup>-5</sup>) and *p.Arg82Ser* (MAF 1.57e10<sup>-5</sup>). We created stable

177 *MLKL*<sup>-/-</sup> HT29 cell lines that exogenously express gene constructs encoding *MLKL*<sup>S83C</sup> and  
178 *MLKL*<sup>R82S</sup> and assessed their capacity to execute necroptosis. Cells expressing *MLKL*<sup>S83C</sup> died  
179 with similar kinetics to *MLKL*<sup>WT</sup> following necroptotic stimulation however, *MLKL*<sup>R82S</sup>  
180 reconstituted cells were resistant to cell death (**Supplementary Figure 1M**). Consistent with our  
181 observations for *MLKL*<sup>S83D</sup>, *MLKL*<sup>R82S</sup> was phosphorylated at Ser357/Thr358, and the  
182 *MLKL*<sup>R82S,S132P</sup> compound mutant restored necroptotic killing function (**Supplementary Figure**  
183 **1M, N**). Whilst gene variants at or adjacent to the S83 inhibitory phosphorylation site are less  
184 frequent than the *MLKL* *S132P* polymorphism in humans, they nonetheless strengthen the  
185 precedent for genetically encoded diversity in human MLKL function, and the potential for  
186 functionally synergistic or neutralising combinations of *MLKL* gene variants.

### 187 *MLKL*<sup>S131P</sup> mice exhibit differences in steady state immune cell populations

188 To address if the *MLKL* *S132P* polymorphism contributes to immunoinflammatory disease, we  
189 performed detailed histological, immunophenotypic, and experimental analyses of a CRISPR  
190 generated knockin mouse which carried the orthologous mutation, *Mikl*<sup>S131P</sup>. *Mikl*<sup>S131P</sup>  
191 heterozygotes and homozygotes were born according to the expected Mendelian ratios and had  
192 normal lifespans (**Figure 2A, B**). The healthy presentation of *Mikl*<sup>S131P</sup> mice contrasts with the  
193 lethal phenotypes of mice engineered to encode *Mikl*<sup>D139V</sup> and *Mikl*<sup>S83G</sup> mutations<sup>30, 34</sup>. Wild-type,  
194 *Mikl*<sup>S131P</sup> heterozygote and homozygote mice had comparable body weight and no gross  
195 histological differences up to 9 months of age (**Figure 2C, Supplementary Figure 2A**). Notably,  
196 distinct from *Mikl*<sup>D139V</sup> or *Mikl*<sup>S83G</sup> homozygotes, no inflammation was detected in the salivary  
197 glands, mediastinum, liver or lungs (**Supplementary Figure 2A**)<sup>30, 34</sup>. No differences in the  
198 number of circulating platelets, red blood cells, or white blood cells were observed between wild-  
199 type, *Mikl*<sup>S131P</sup> heterozygote and homozygote mice across age (**Supplementary Figure 2B-D**).

200 However, reduced numbers of classical Ly6C<sup>hi</sup> ‘inflammatory’ monocytes in the bone marrow,  
201 but not in the secondary lymphoid organs (spleen and inguinal lymph nodes), were observed in  
202 *Mlkl*<sup>S131P</sup> homozygotes and heterozygotes relative to wild-type littermate controls (**Figure 2D,**  
203 **Supplementary Figure 2E, J, O**). In the secondary lymphoid organs, *Mlkl*<sup>S131P</sup> homozygotes had  
204 a small but significant increase splenic CD4<sup>+</sup> T cells and B cells relative to wild-type littermate  
205 controls (**Figure 2E, Supplementary Figure 2M, N**). Compared to wild-type controls, *Mlkl*<sup>S131P</sup>  
206 heterozygotes had significant increases in splenic and lymph node B cell populations, as well as  
207 splenic CD8<sup>+</sup> T cells and Ly6C<sup>lo</sup> monocytes (**Figure 2E, F, Supplementary Figure 2J-S**). All  
208 other innate and adaptive immune cell populations were comparable between genotypes in the  
209 bone marrow, spleen, and inguinal lymph nodes (**Figure 2D-F, Supplementary Figure 2E-S**).  
210 Further, wild-type, heterozygote and homozygote mice had comparable levels of plasma cytokines  
211 at steady state (**Figure 2G**).

212 To investigate the underlying cause of reduced Ly6C<sup>hi</sup> monocytes in the bone marrow of *Mlkl*<sup>S131P</sup>  
213 homozygote mice, we examined both the abundance of different myeloid stem cell populations,  
214 and their capacity to differentiate and form colonies *ex vivo*. *Mlkl*<sup>WT/WT</sup> and *Mlkl*<sup>S131P/S131P</sup>  
215 hematopoietic stem cells exhibited equivalent capacity to generate blast, eosinophil, granulocyte,  
216 granulocyte-macrophage, and megakaryocyte colonies under all stimulations investigated (**Figure**  
217 **2H**). While the number and composition of myeloid progenitor cell populations in the bone  
218 marrow were not significantly different (**Supplementary Figure 2T, U**), compared to *Mlkl*<sup>WT/WT</sup>,  
219 *Mlkl*<sup>S131P/S131P</sup> bone marrow gave rise to an increased number of macrophage colonies under SCF,  
220 IL-3 and EPO combined stimulation (**Figure 2H**).

221 We next sought to address whether mouse MLKL<sup>S131P</sup> exhibited a gain-in-function comparable to  
222 our finding for MLKL<sup>S132P</sup> in human cells. Primary and immortalized fibroblasts isolated from the

223 dermis of *Mlkl*<sup>S131P</sup> homozygote, heterozygote and wild-type mice were examined for their relative  
224 capacity to die in the presence or absence of death stimuli. We did not observe any differences in  
225 TNF-induced apoptosis (TNF and Smac mimetic; TS) between *Mlkl*<sup>S131P/S131P</sup> and *Mlkl*<sup>WT/WT</sup>  
226 immortalized MDFs (**Figure 2I**). However, *Mlkl*<sup>S131P/S131P</sup> MDFs showed a diminished capacity to  
227 undergo TSI-induced (TNF, Smac mimetic compound A, pan-caspase inhibitor IDN-6556; TSI)  
228 necroptotic cell death (**Figure 2I, Supplementary Figure 2V**). This was driven by reduced  
229 MLKL protein levels in MDF cells with the *Mlkl*<sup>S131P</sup> allele (**Figure 2J, Supplementary Figure**  
230 **2W**). Immortalized MDFs, and to a lesser extent primary MDFs, did show clear *Mlkl*<sup>S131P</sup> allele-  
231 dependent sensitivity to IFN- $\beta$ , a strong inducer of *Mlkl* gene expression in mice (**Figure 2I,**  
232 **Supplementary Figure 2V**)<sup>48</sup>. This sensitivity was further enhanced by TNF and was refractory  
233 to inhibitors of RIPK1 (Nec-1s) or RIPK3 (GSK'872) (**Figure 2I, Supplementary Figure 2V**).  
234 These results are analogous to cells expressing the constitutively-active *MLKL*<sup>D139V</sup> mutant<sup>34</sup> and,  
235 together, support the notion that *MLKL*<sup>S131P</sup> has constitutive RIPK3-independent activity when  
236 endogenously expressed in mouse cells<sup>34</sup>. These endogenous *Mlkl*<sup>S131P</sup> observations were not  
237 limited to fibroblasts. In bone marrow derived macrophages (BMDMs), *Mlkl*<sup>S131P/S131P</sup> cells also  
238 exhibited diminished sensitivity to TSI-induced necroptosis and endogenously produced  
239 *MLKL*<sup>S131P</sup> was present at reduced levels in comparison to *MLKL*<sup>WT</sup> (**Supplementary Figure 2X,**  
240 **Y**). In contrast to immortalized dermal fibroblasts, BMDMs derived from *Mlkl*<sup>S131P</sup> homozygotes  
241 did not undergo cell death in the presence of IFN- $\beta$  alone, despite clear IFN- $\beta$  induced upregulation  
242 of *MLKL* protein relative to untreated cells (**Supplementary Figure 2X, Y**). Overall, these data  
243 show that, across different cell types, *MLKL*<sup>S131P</sup> is not toxic at steady state, but upon different  
244 stimuli, both gain- and loss-of-sensitivity to necroptotic cell death is evident. This suggests that

245 any functional deficits or enhancements in carriers of the *MLKL S132P* polymorphism are likely  
246 to be diverse, with cell- and/or context- specific manifestations.

### 247 **Emergency hematopoiesis is defective in *Mkl<sup>S131P/S131P</sup>* mice**

248 Differences in steady state immune cell populations suggest that overt phenotypes may develop in  
249 *Mkl<sup>S131P</sup>* homozygotes following experimental challenge. Specifically, reduced numbers of steady  
250 state Ly6C<sup>hi</sup> monocytes in the bone marrow of *Mkl<sup>S131P</sup>* homozygotes could indicate a defect in  
251 hematopoiesis. To test this, we examined recovery from myelosuppressive irradiation as an  
252 assessment of hematopoietic function in mice carrying the *Mkl<sup>S131P</sup>* allele. Following  
253 myelosuppressive irradiation, recovery of hematopoietic cell numbers and circulating peripheral  
254 blood cells was significantly delayed in *Mkl<sup>S131P/S131P</sup>* mice compared with wild-type controls  
255 (**Figure 3A-F**). In *Mkl<sup>S131P/S131P</sup>* mice, peripheral red blood cell and platelet numbers were  
256 significantly reduced at 14 days post irradiation, with the former also decreased at 21 days (**Figure**  
257 **3A, B**). Despite equivalent total white blood cell numbers at 21 days post irradiation, a significant  
258 reduction in peripheral monocyte numbers and a non-significant decrease trend in neutrophils was  
259 observed in *Mkl<sup>S131P/S131P</sup>* mice compared to wild-type controls (**Figure 3C, Supplementary**  
260 **Figure 3A, B**). These reductions in circulating blood cell numbers were accompanied by  
261 significant decreases in the nucleated viable, progenitor, and LSK cell populations in the bone  
262 marrow of *Mkl<sup>S131P/S131P</sup>* mice (**Figure 3D-F**). Contrastingly, at 21 days post irradiation, *Mkl<sup>S131P</sup>*  
263 heterozygotes displayed a significant increase in their total nucleated viable cells in comparison to  
264 wild-type controls. This was driven predominantly by significant increases in the number of LSK  
265 cells (**Figures 3D, E**). Impaired recovery of *Mkl<sup>S131P/S131P</sup>* LSK and progenitor cell numbers was  
266 characterized by increased expression of ROS and Annexin V at 21 days post irradiation  
267 (**Supplementary Figure 3C, D**). *Mkl<sup>S131P</sup>* homozygotes had increased plasma G-CSF levels at 14

268 and 21 days post irradiation when compared to *Mkl<sup>WT/WT</sup>* controls (**Figure 3G**). At 21 days, all  
269 other plasma cytokines, with exception of IL-1 $\beta$  and RANTES, were equivalent between  
270 genotypes (**Supplementary Figure 3E**). *Mkl<sup>WT/S131P</sup>* and *Mkl<sup>S131P/S131P</sup>* mice had decreased  
271 plasma IL-1 $\beta$  levels, whilst *Mkl<sup>S131P/S131P</sup>* mice alone had reduced RANTES levels compared to  
272 *Mkl<sup>WT/WT</sup>* controls (**Supplementary Figure 3E**).

273 To investigate whether the *Mkl<sup>S131P</sup>* homozygote defect was intrinsic to the hematopoietic stem  
274 cells, we performed competitive transplantation studies. *Mkl<sup>WT/WT</sup>*, *Mkl<sup>WT/S131P</sup>* or *Mkl<sup>S131P/S131P</sup>*  
275 bone marrow was mixed with GFP<sup>+</sup> competitor bone marrow in a 50:50 ratio and injected into  
276 Ly5.1 irradiated hosts. Six weeks post-transplantation, *Mkl<sup>WT/WT</sup>* bone marrow had competed with  
277 GFP<sup>+</sup> bone marrow effectively, whilst *Mkl<sup>S131P/S131P</sup>* bone marrow performed poorly, contributing  
278 to 7%, 5% and 9% of PBMCs (Ly5<sup>+</sup>), red blood cells and platelets respectively (**Figure 3H**,  
279 **Supplementary Figure 3F, G**). Under competitive transplant conditions, *Mkl<sup>WT/S131P</sup>* bone  
280 marrow competed comparably to *Mkl<sup>WT/WT</sup>* with approximately 50% of the peripheral cells  
281 generated from these donor stem cells (**Figure 3H, Supplementary Figure 3F, G**). When mixed  
282 in excess at 70:30 with GFP<sup>+</sup> competitor bone marrow, *Mkl<sup>S131P/S131P</sup>* stem cells were again  
283 outcompeted contributing to less than 10 % of the peripheral blood cells (**Supplementary Figure**  
284 **3H-J**). Thus, the defect in emergency hematopoiesis was intrinsic to *Mkl<sup>S131P/S131P</sup>* hematopoietic  
285 stem cells, and reminiscent of an intrinsic defect previously reported for the *Mkl<sup>D139V</sup>*  
286 autoactivating mutant<sup>34</sup>.

287

288 **Recruitment of Ly6C<sup>hi</sup> monocytes to sites of sterile inflammation is reduced in *Mkl<sup>S131P/S131P</sup>***  
289 **mice**

290 To examine if the defects in emergency hematopoiesis displayed by *Mikl*<sup>S131P/S131P</sup> mice could  
291 result in defective immune cell recruitment to sites of inflammation or infection, we employed a  
292 model of localized sterile inflammation induced by zymosan. Intra-peritoneal injection of zymosan  
293 results in a rapid influx of immune cells, predominantly neutrophils, into the peritoneal cavity over  
294 72 hours<sup>49</sup>. The cellular content of the peritoneal cavity and numbers of circulating peripheral  
295 blood cells was examined at 4 and 24 hours post-zymosan injection. *Mikl*<sup>S131P/S131P</sup> mice displayed  
296 equivalent early recruitment of neutrophils and other immune cells to the peritoneum (**Figure 4A,**  
297 **B, Supplementary Figure 4A-H**). However, at 24 hours post-zymosan injection, *Mikl*<sup>S131P/S131P</sup>  
298 mice had significant reductions in the number of Ly6C<sup>hi</sup> monocytes recruited to the peritoneum  
299 (**Figure 4C, D, Supplementary Figure 4I-P**). In the peripheral blood, monocytes were  
300 significantly elevated in *Mikl*<sup>S131P/S131P</sup> mice in comparison to wild-type controls at 4 hours post-  
301 zymosan (**Figure 4E, Supplementary Figure 4Q-S**). However, by 24 hours, the number of  
302 peripheral blood monocytes was equivalent between genotypes, with only a non-significant  
303 increase in neutrophils observed in *Mikl*<sup>S131P/S131P</sup> mice (**Figure 4F, Supplementary Figure 4T-**  
304 **V**). We also measured cytokines present in the peritoneum at 4 and 24 hours post-zymosan  
305 injection (**Figure 4G, Supplementary Figure 4W-Y**). At 4 hours, *Mikl*<sup>S131P/S131P</sup> mice had  
306 increased quantities of IL-13, IL-17A and MCP-1, whilst *Mikl*<sup>WT/S131P</sup> had increased quantities of  
307 eotaxin, when compared to wild-type controls (**Figure 4G**). No statistically significant differences  
308 were observed in the quantities of peritoneal cytokines between any genotypes at 24 hours post-  
309 injection (**Supplementary Figure 4Y**).

310 We previously observed that *Mikl*<sup>S131P/S131P</sup> cells exhibited reduced response to TSI-induced  
311 necroptosis. To assess whether this defect in necroptotic function was observed in activated  
312 immune cells recruited to sites of inflammation, we isolated neutrophils from the peritoneum at 4

313 hours post-zymosan injection. Consistent with our previous *in vitro* findings, no differences were  
314 observed in the capacity of *Mkl<sup>S131P/S131P</sup>* inflammatory neutrophils to undergo spontaneous  
315 apoptosis (**Supplementary Figure 4Z**). However, the percentage of *Mkl<sup>S131P/S131P</sup>* inflammatory  
316 neutrophils dying following necroptotic stimulation with TSI was decreased in comparison to  
317 wild-type neutrophils (**Figure 4H**).

318

### 319 ***Mkl<sup>S131P</sup>* homozygotes exhibit reduced capacity to clear *Salmonella* infection**

320 Reductions in the recruitment of Ly6C<sup>hi</sup> monocytes to sites of inflammation raise important  
321 questions as to whether the *Mkl<sup>S131P</sup>* mutation impacts defense against pathogens. *Salmonella*  
322 *enterica* has long been an important pathogenic selective pressure in humans<sup>50</sup>. For non-typhoidal  
323 *Salmonella* serovars, such as *S. enterica* serovar *Typhimurium*, human infection is typically limited  
324 to the gastric mucosa<sup>51,52</sup>. In mice and immunocompromised humans, *S. Typhimurium* can cause  
325 severe systemic disease after dispersal from the gut by dendritic cells and macrophages to  
326 peripheral organs including the spleen and liver<sup>53</sup>.

327 *Mkl<sup>S131P</sup>* homozygote, heterozygote and wild-type mice were infected with a metabolically  
328 growth-attenuated *Salmonella typhimurium* strain BRD509 (from here referred to as *Salmonella*),  
329 via oral gavage (1 x 10<sup>7</sup> colony forming units (CFU)). Daily monitoring for the 14 day infection  
330 period showed no differences in core body temperature or body mass between genotypes  
331 (**Supplementary Figure 5A, B**). Consistent with normal weights, there were no obvious  
332 differences in the integrity of the intestinal epithelial barrier or intestinal monocyte and  
333 macrophage populations at infection endpoint (**Figure 5A**). Despite this, *Mkl<sup>S131P/S131P</sup>* mice had  
334 increased *Salmonella* burden in both the spleen and liver compared to wild-type controls (**Figure**



335 **5B, Supplementary Figure 5C, D).** Bacterial colonization in the feces was increased in female  
336 *Mkl<sup>S131P/S131P</sup>* mice relative to wild-type female controls (**Figure 5B, Supplementary Figure 5E**).  
337 In the peripheral blood, *Mkl<sup>S131P/S131P</sup>* mice had significantly reduced numbers of circulating  
338 lymphocytes and monocytes, as well as a trend towards decreased numbers of circulating  
339 neutrophils (**Figure 5C, Supplementary Figure 5F-H**). Infected *Mkl<sup>S131P/S131P</sup>* mice also  
340 exhibited significant decreases in the quantity of splenic Ly6C<sup>hi</sup> monocytes in comparison to  
341 infected wild-type controls (**Figure 5D, E, Supplementary Figure 5I-O**). At 14 days post-  
342 infection, *Mkl<sup>WT/S131P</sup>* and *Mkl<sup>S131P/S131P</sup>* mice both had significant increases in plasma  
343 concentrations of MCP-1, when compared to wild-type controls (**Figure 5F**). All other plasma  
344 cytokines were equivalent between genotypes at 14 days post-infection (**Figure 5G**). Splenic  
345 (Ly6C<sup>hi</sup>) and circulating monocytes were still significantly decreased in homozygous mice.

346 We did not observe any differences in the kinetics of *Salmonella* induced cell death in *ex vivo*  
347 BMDM infection assays, nor inflammasome activation, measured by GSDMD cleavage  
348 (**Supplementary Figure 5P, Q**). Together these data show a hindered pathogen defense in  
349 *Mkl<sup>S131P</sup>* homozygotes accompanied by widespread immunophenotypic deficiencies. Combined,  
350 our investigations of *Mkl<sup>S131P</sup>* homozygotes under challenge highlight a defect in emergency  
351 hematopoiesis that manifests in a disruption to integral inflammatory and immune responses. This  
352 provides important insights into the potential modulation of immunoinflammatory disorders in  
353 *MLKL S132P* carriers.

## 354 **DISCUSSION**

355 A high frequency *MLKL S132P* polymorphism present in 2-3% of the global population  
356 confers a gain-of-function to MLKL resulting in hematopoietic dysfunction and immune cell

357 defects in a genetically modified mouse model. In human cells,  $MLKL^{S132P}$  was resistant to  
358 chemical inhibition by necrosulfonamide treatment and endogenous inhibitory phosphorylation at  
359 Serine 83. A gain in necroptotic function was also observed when the murine equivalent,  $Mkl^{S131P}$ ,  
360 was examined *in situ*. Fibroblasts isolated from  $Mkl^{S131P}$  homozygotes exhibit RIPK3-independent  
361 cell death in the presence of IFN- $\beta$ , a strong inducer of *Mkl* gene expression. Under regular culture  
362 conditions,  $MLKL^{S131P}$  protein levels are reduced relative to  $MLKL^{WT}$ , manifesting in a reduced  
363 capacity for necroptosis in fibroblasts and immune cells stimulated with TSI. While the reduction  
364 in  $MLKL^{S132P}$  protein levels was also evident in PBMCs isolated from one human individual  
365 heterozygous for this polymorphism, our capacity to fully compare between mouse and human  
366 systems is significantly limited by the lack of suitable human cell lines that express  $MLKL^{S132P}$   
367 from its endogenous gene locus.

368 Extensive characterization of the  $Mkl^{S131P}$  mouse unveiled steady state decreases in the  
369 bone marrow pool of inflammatory Ly6C<sup>hi</sup> monocytes, that were also reflected in reduced numbers  
370 at sites of sterile inflammation and bacterial infection. During zymosan-induced peritonitis,  
371 increased peripheral monocytes were observed at 4 hours however, Ly6C<sup>hi</sup> monocytes were  
372 significantly reduced in the peritoneum of homozygotes at 24 hours. Under infection challenge, an  
373 increased burden of *Salmonella* was present in the spleen and liver of homozygotes, accompanied  
374 by significant reductions in the circulating lymphocytes and monocytes. In both cases, monocyte  
375 deficits were accompanied by an increase in plasma MCP-1 levels. These deficits are not attributed  
376 to any inherent deficits in  $Mkl^{S131P}$  mouse monocyte/macrophage progenitor cell populations at  
377 steady state, nor in their capacity to differentiate and form colonies when measured *ex vivo*.  
378 Hematopoietic dysfunction in  $Mkl^{S131P}$  homozygotes is however evident following radio-ablation,  
379 with a severely reduced capacity for stem cells to repopulate *in situ*, or even  $Mkl^{WT}$  recipients.

380 Hematopoietic stem cells expressing the constitutively active *Mkl*<sup>S131P</sup> are characterized by  
381 increased ROS and Annexin V positivity following irradiation, marking their enhanced propensity  
382 for cell death. Taken together, the capacity for monocyte generation, activation and localisation  
383 within the *Mkl*<sup>S131P</sup> mouse under conditions of stress has emerged as the most enticing area for  
384 future investigation.

385 Prior to this work two other single point mutant *Mkl* mouse models, *Mkl*<sup>D139V</sup> and  
386 *Mkl*<sup>S83G</sup>, had been reported, both of which exhibited full or partial homozygous postnatal lethality  
387 characterized by severe inflammation<sup>30, 34</sup>. In stark contrast to these models, the *Mkl*<sup>S131P</sup>  
388 homozygotes were born normal and with no signs of inflammatory disease at steady state.  
389 However, upon challenge, similarities between *Mkl*<sup>S131P</sup> and *Mkl*<sup>D139V</sup> mice were revealed.  
390 Hematopoietic dysfunction is observed following myelosuppressive irradiation in homozygous or  
391 heterozygous mice harboring the *Mkl*<sup>S131P</sup> or *Mkl*<sup>D139V</sup> mice, respectively<sup>34</sup>.

392 Despite the ostensible basal state phenotypes of *Mkl*<sup>D139V</sup> and recently described *Mkl*<sup>S83G</sup>  
393 homozygotes differing from the *Mkl*<sup>S131P</sup> homozygotes<sup>30, 34</sup>, there were similarities observed at the  
394 molecular level. As for MLKL<sup>S131P</sup>, RIPK3-independent gain-of-function was reported for  
395 MLKL<sup>D139V</sup>, but not MLKL<sup>S83G</sup><sup>30, 34</sup>. This major similarity in molecular function is not unexpected  
396 considering the proximity of the D139 and S131 residues within MLKL. Constitutive activity of  
397 the D139V brace helix mutants is restrained by cellular mechanisms that limited protein level, with  
398 decreases in endogenous MLKL observed in cells generated from *Mkl*<sup>D139V</sup> homozygotes.  
399 Interestingly, ubiquitin-mediated targeting of MLKL to the lysosome was identified to be  
400 mechanistically involved in the restraint of necroptosis in cells expressing MLKL<sup>D139V</sup>, and as a  
401 means of clearing endosomal *Listeria monocytogenes* and *Yersinia enterocolita*<sup>34, 54, 55</sup>. Exploring  
402 if the reduction in cellular MLKL levels we observed in the PBMCs of a human carrier of the

403 *MLKL*<sup>S132P</sup> polymorphism, or cells isolated from the *MLKL*<sup>S131P</sup> mouse, is likewise mediated by  
404 ubiquitination and lysosomal targeting will be an important next step, particularly as it relates to  
405 the clearance of these intracellular bacteria from human cells. Ablation of the inhibitory  
406 phosphorylation site in *Mkl*<sup>S83G</sup> mice similarly subjects MLKL to downregulation in mouse cells  
407 <sup>30</sup>. In sum, our analysis of *MLKL*<sup>S131P</sup> further highlights the importance of cellular mechanisms  
408 that clear activated MLKL from cells below a threshold to reduce aberrant necroptotic cell death.

409         The finding that *MLKL*<sup>S132P</sup> retains necroptotic killing activity despite simulated inhibitory  
410 phosphorylation at Ser83 in human cells is highly notable. The inflammatory phenotypes that  
411 result from homozygosity of the phosphoablating(S83G) mutation provides insight into the  
412 potential disease development that may occur in carriers of the *MLKL* *S132P* polymorphism under  
413 environmental and cellular scenarios where Ser83 inhibitory phosphorylation is deployed.  
414 Identifying the kinase(s) responsible for phosphorylation at MLKL Ser83 and understanding which  
415 cell types are primed to deploy this kinase(s) is an important next step in determining if this  
416 polymorphism promotes clinically relevant changes to homeostasis or disease outcomes in  
417 humans.

418         Evidence for positive selection has been found for over 300 immune-related gene loci and  
419 many of these have been found to be associated with the incidence of autoimmune and  
420 autoinflammatory disease in modern humans <sup>56, 57</sup>. Many of these variants have also been  
421 mechanistically linked to pathogen defense (Karlsson et al., 2014, Ramos et al., 2015), with  
422 pathogenic microbes a major driver of genetic selection over human history. While a diminished  
423 capacity for mice to clear disseminated *Salmonella* would argue against the hypothesis that the  
424 *MLKL* *S132P* polymorphism has been positively selected for in human populations, it is important  
425 to note that only 1.4 % of human carriers are homozygotes <sup>40</sup>. *MLKL* *S132P* heterozygosity is by

426 far the most prevalent, and evolutionarily relevant, human scenario. *Mkl*<sup>S131P</sup> heterozygote mice  
427 displayed gene dosage phenotypes consistent with homozygotes, with one exception. Following  
428 sublethal myelosuppressive irradiation, a gain in bone marrow hematopoietic stem cell numbers  
429 in heterozygotes was observed at day 21 whilst a catastrophic drop occurred in homozygotes. This  
430 increased stem cell capacity does not persist long-term. In competitive bone marrow transplants,  
431 *Mkl*<sup>WT/S131P</sup> stem cells compete similarly to *Mkl*<sup>WT/WT</sup> stem cells at 6 weeks post-transplantation.  
432 However, the increased fitness conferred to heterozygous mice at this early timepoint provides  
433 intriguing insights into other selective pressures that may have promoted accumulation of this  
434 polymorphism in humans<sup>58</sup>. Sepsis, where emergency hematopoiesis is an essential determinant  
435 in survival, is an interesting and highly evolutionarily important avenue of exploration for the  
436 study of *MLKL S132P* polymorphism frequency<sup>59, 60</sup>. Since nutrition is another important driver  
437 of genetic adaptation in humans, exploring the role of *MLKL S132P* in metabolic disease is also  
438 of interest. An important precedent for this is a recent report of an association between human  
439 RIPK1 promoter polymorphisms and diet-induced obesity<sup>61</sup>. The potential for negative selection  
440 of this polymorphism over time is also an important avenue of exploration in light of the recent  
441 discovery of a common *TYK2* variant and its role in enhancing susceptibility to severe infection  
442 by historically important human pathogen mycobacterium tuberculosis<sup>62, 63</sup>.

443 By many, MLKL is viewed as a potential therapeutic target for drug discovery due to its  
444 established involvement in multiple human diseases, especially inflammatory pathologies<sup>34, 64, 65</sup>,  
445<sup>66</sup>. To date no human clinical trials have been conducted on MLKL-targeted small molecules,  
446 although several inhibitors have been reported in the literature, including human MLKL inhibitor  
447 necrosulfonamide (NSA), which all function by targeting Cys86<sup>16, 67</sup>. Intriguingly, we show that  
448 in the presence of NSA human MLKL<sup>S132P</sup> protein displays a gain-of-function that results in non-

449   inhibitable cell death. While NSA has been a fundamental tool for *in vitro* studies of necroptosis,  
450   our findings raise interesting questions about the suitability of Cys86-targetted MLKL inhibitors  
451   for the 2-3% of the population that carry the *MLKL S132P* polymorphism.

452

## 453 **METHODS**

### 454 **Patient Recruitment, Ethics and Informed consent**

455 Patients and their relatives were recruited from the Department of Clinical Immunology and  
456 Allergy, Royal Melbourne Hospital, Victoria, Australia and the Centre for Personalized  
457 Immunology, Australian National University, Canberra, Australia. Unrelated, age and sex matched  
458 ‘healthy’ controls that did not carry the *MLKL p.Ser132Pro* polymorphism were recruited via the  
459 Volunteer Blood Donor Registry, Parkville. Informed consent was obtained from all participants  
460 for genomic analysis and immunological studies. All procedures were performed and are reported  
461 here with the approval of human ethics review boards of all Institutes that participated in human  
462 genetics studies; Australian National University, The Walter and Eliza Hall Institute of Medical  
463 Research (approved projects 2009.162, 10/02) and with the 1964 Helsinki declaration and its later  
464 amendments or comparable ethical standards.

### 465 **Genomic analysis**

466 Whole exome sequencing was performed by the Canberra Clinical Genomics service. Libraries  
467 were prepared and enriched using the SureSelect Clinical Research Exome v2 kit (Agilent  
468 Technologies), and targeted regions were sequenced using an Illumina sequencing system with  
469 100bp paired-end reads, with an average depth of >35. Reads were aligned to the human genome  
470 reference sequence (GRCh38) using the Burrows-Wheeler Aligner (BWA-MEM), and variant  
471 calls made using the Genomic Analysis Tool Kit (GATK).

### 472 **Animal ethics**

473 All mice were housed at the Walter and Eliza Hall Institute of Medical Research (WEHI),  
474 Australia. This facility is a temperature and humidity controlled specific pathogen free facility with

475 a 12h:12h day night cycle. All experiments were approved by the WEHI Animal Ethics Committee  
476 in accordance with the Prevention of Cruelty to Animals Act (1986) and the Australian National  
477 Health and Medical Research Council Code of Practice for the Care and Use of Animals for  
478 Scientific Purposes (1997).

## 479 **Mice**

480 Mice were generated on a C57BL/6J background. The *p.Ser131Pro* mutation in the *Mkl1* gene  
481 (*Mkl1<sup>S131P</sup>*) was generated using CRISPR/Cas9 by the Melbourne Advanced Genome Editing  
482 Centre (MAGEC) laboratory at WEHI, following the same methodology as previously described  
483 <sup>34, 68</sup>. To introduce a proline-coding mutation in place of Ser131 within the *Mkl1* gene, an sgRNA  
484 of the sequence CTGTCGATCTTCCTGCTGCC was used to create double stranded breaks within  
485 the *Mkl1* locus and initiate homologous recombination.

486 An oligo donor  
487 (TGTTGCTGCTGCTTCAGGTTTATCATTGGAATACCGTTTCAGATGTCAGCCAGCCAG  
488 CACCATGGCAGCAGGAAGATCGACAGGATGCAGAGGAAGACGGgtgagtctcccaagactgg  
489 ga) was subsequently used to introduce the S131P mutation. Genotyping of mice was completed  
490 by Transnetyx using custom probe Mkl-8 MUT (Forward Primer:  
491 CTGCTTCAGGTTTATCATTGGAATACC, Reverse Primer:  
492 TCTGCATCCTGTCGATCTTCCT).

## 493 **Reagents**

494 Antibodies; Rat anti-mMLKL 8F6<sup>34</sup>(1:2000), rat anti-mMLKL 5A6<sup>69</sup> (1:1000; available from  
495 Merck-Millipore as MABC1634), rat anti-hMLKL 10C2<sup>22</sup> (1:1000; available from Merck-  
496 Millipore as MABC1635), rat anti-hMLKL 7G2<sup>22</sup> (1:1000; available from Merck-Millipore as



497 MABC1636), rat anti-hRIPK3 1H2<sup>4</sup> (1:1000; available from Merck-Millipore as MABC1640)  
498 were produced in-house. Mouse anti-actin (A-1978; 1:5000) was purchased from Sigma-Aldrich,  
499 rabbit anti-GAPDH (#2118; 1:2000-5000) was purchased from Cell Signalling Technology, rabbit  
500 anti-VDAC (AB10527; 1:10000) was purchased from Millipore, rabbit anti-human pMLKL  
501 (EPR9514; 1:1000-3000) was purchased from Abcam, and rabbit anti-mouse pMLKL (D6E3G;  
502 1:1000) was purchased from CST. Cell treatments were completed with agonists/antagonists at the  
503 following concentrations: 100 ng/ml recombinant hTNF-Fc (produced in house as in <sup>70</sup>), 500 nM  
504 Smac mimetic Compound A (provided by Tetralogic Pharmaceuticals; as in <sup>71</sup>, 5  $\mu$ M Pan-caspase  
505 inhibitor IDN-6556 (provided by Tetralogic Pharmaceuticals), 1  $\mu$ M necrosulfonamide (NSA;  
506 Merck #480073), 5  $\mu$ M necrostatin (Nec-1s; Merk #504297), 1  $\mu$ M GSK'872 (SynKinase #SYN-  
507 5481), 10-20 ng/ml lipopolysaccharide (LPS; Sigma #L2630), 25  $\mu$ g/ml polyinosinic:polycytidylic  
508 (Poly I:C; Novus), 200 nM MG132 (Merck #474790), 2 nM PS341 (Sigma #504314), and 30  
509 ng/ml mouse IFN $\beta$  (R&D Systems #8234-MB-010)

## 510 **Generation of cell lines**

511 Mutations were introduced into a human MLKL DNA template (from DNA2.0, CA) using  
512 oligonucleotide-directed PCR and sub-cloned into the pF TRE3G PGK puro vector<sup>18</sup>. Vector DNA  
513 was co-transfected into HEK293T cells with pVSVg and pCMV  $\delta$ R8.2 helper plasmids to generate  
514 lentiviral particles. U937 (WT and *MLKL*<sup>-/-</sup>) and HT29 (WT and *MLKL*<sup>-/-</sup>) were then stably  
515 transduced with exogenous human MLKL ligated into pFTRE3G. Successfully transduced cells  
516 were selected using puromycin (2.5 $\mu$ g/mL; StemCell Technologies) using established procedures  
517 <sup>18, 27, 46</sup>. The following oligonucleotides were used for the assembly of constructs:

518 hMLKL<sup>S132P</sup> fwd; 5' GCCAAGGAGCGCCCTGGGCACAG3'

- 519 hMLKL<sup>S132P</sup> rev; 5' CTGTGCCCAGGGCGCTCCTTGGC 3'
- 520 hMLKL<sup>TSEE</sup> fwd; 5' GAGGAAAACACAGGAGGAAATGAGTTTGGGAAC 3'
- 521 hMLKL<sup>TSEE</sup> rev; 5' GTTCCCAAACCTCATTTCTCCTGTGTTTCCTC 3'
- 522 hMLKL<sup>S83A</sup> fwd; 5' GTTCAGCAATAGAGCCAATATCTGCAG 3'
- 523 hMLKL<sup>S83A</sup> rev; 5' CCTGCAGATATTGGCTCTATTGCTGAAC 3'
- 524 hMLKL<sup>S83D</sup> fwd; 5' GAAAAGTTCAGCAATAGAGACAATATCTGCAGGTTTC 3'
- 525 hMLKL<sup>S83D</sup> rev; 5' GAAACCTGCAGATATTGTCTCTATTGCTGAACTTTTC 3'
- 526 hMLKL<sup>S83C</sup> fwd; 5' GTTCAGCAATAGATgCAATATCTGCAGG 3'
- 527 hMLKL<sup>S83C</sup> rev; 5' CCTGCAGATATTGcATCTATTGCTGAAC 3'
- 528 hMLKL<sup>R82S</sup> fwd; 5' GAAAAGTTCAGCAATAGCTCCAATATCTGCAG 3'
- 529 hMLKL<sup>R82S</sup> rev; 5' CTGCAGATATTGGAGCTATTGCTGAACTTTTC 3'

530 Primary mouse dermal fibroblasts (MDFs) were prepared from skin taken from the head and body  
531 of 1 day old mice. These MDFs were immortalised by stable lentiviral transduction with SV40  
532 large T antigen. Bone marrow derived macrophages were generated from the long bones of adult  
533 mice and grown for 7 days in DMEM supplemented with 15% L929 cell supernatant.

534 Human blood (patient and healthy donor) was collected by collaborators via venipuncture at the  
535 Royal Melbourne Hospital. Collected blood was diluted with PBS and layered on an equal volume  
536 of Histopaque (density 1.077 g/ml) and centrifuged for 30 minutes, 700 x g at 20 °C. The layer

537 containing peripheral blood mononuclear cells (PBMCs) was harvested and washed with PBS,  
538 then frozen in FCS + 10 % DMSO and stored in liquid nitrogen.

### 539 **Culture of cell lines**

540 Primary MDFs, immortalised MDFs and HT29s were cultured in DMEM + 8% FCS. BMDMs  
541 were cultured in DMEM + 15% FCS + 20% L929. U937 and PBMCs were cultured in RPMI +  
542 8% FCS. All cell lines were grown at 37 °C and 10% (v/v) CO<sub>2</sub>.

### 543 **Western blot**

544 U937 cells were seeded into 48-well plates at 60,000 cells/well and induced for 3 hours with  
545 doxycycline (20 ng/mL, 100 ng/mL or 500 ng/mL) to stimulate MLKL expression. HT29 cells  
546 were seeded into 48-well plates at 45,000 cells/well and following 12-14 hours of cell adherence,  
547 cells were induced overnight with doxycycline (20 ng/mL, 100 ng/mL or 500 ng/mL) for  
548 stimulation of MLKL expression. BMDMs were plated at 400,000 cells/well in a 24-well plate  
549 and MDFs (primary and immortalised) were plated at 30,000 cells/well in a 48-well plate. Cells  
550 were stimulated as indicated at described for 6 hours, except for BMDMs stimulated with LPS for  
551 2 hours before addition of Smac mimetic Compound A for a further 4 hours. Human primary  
552 PBMCs were plated at 45,000 cells/well and stimulated for 4 hours. All cells were harvested in 2  
553 x SDS Laemmli's lysis buffer, boiled at 100 °C for 10-15 min, and then resolved by 4-15% Tris-  
554 Glycine SDS-PAGE (Bio-Rad). Proteins were transferred to nitrocellulose or PVDF membrane  
555 and probed with antibodies as indicated.

### 556 **IncuCyte analysis**

557 Primary and immortalised MDFs were plated at 8,000 cells per well in a 96-well plate. BMDMs  
558 were plated at 150,000 cells per well on day 6 of culture in a 48-well plate. MDFs and BMDMs

559 were left to settle overnight before stimulation. The next day MDFs and BMDMs were stimulated  
560 in culture media supplemented with propidium iodide. HT29 cells were plated at 45,000 cells per  
561 well in a 48-well plate and left to settle for 6 hours before overnight doxycycline pre-stimulation  
562 (20ng/mL, 100ng/mL or 500ng/mL). HT29 cells were stimulated in Phenol Red-free media  
563 supplemented with 2% FCS, 1mM Na pyruvate, 1mM L-GlutaMAX, SYTOX Green (Invitrogen,  
564 S7020) and either DRAQ5 (Thermofisher, #62251) (MLKL KO HT29) or SPY\_620  
565 (Spirochrome, SC401) (WT HT29).

566 U937 cells were plated at 60,000 cells per well in a 48-well plate and were induced with  
567 doxycycline (20ng/mL, 100ng/mL or 500ng/mL) for 3 hours. Cells were then stimulated in Phenol  
568 Red-free media supplemented with 2% FCS, 1mM Na pyruvate, 1mM L-GlutaMAX, SYTOX  
569 Green and either DRAQ5 (MLKL KO HT29) or SPY\_620 (WT HT29).

570 Neutrophils isolated from the peritoneum at 4 hours post-zymosan injection were counted and  
571 plated at 60,000 cells/well in a 48-well plate. Plating media (RPMI + 8 % FCS) was supplemented  
572 with SYTOX Green and DRAQ5 dyes.

573 Images were taken every hour using IncuCyte SX5 or S3 imaging and cell death was quantified  
574 by number of dead cells (SYTOX Green or propidium iodide positive). Percentage values were  
575 quantified by number of dead cells out of total live cell number (DRAQ5 or SPY620 positive).

#### 576 **TNF ELISA**

577 100,000 cells were stimulated with LPS (10ng/mL) or Poly I:C (2.5µg/mL) for 3 hours. PBMC  
578 supernatant cytokine content was measured by ELISA (R&D: STA00C) according to the  
579 manufacturer's instructions. The measurements were performed in technical triplicates.

#### 580 **Mouse histopathology**

581 7–9-month-old mice were euthanized by CO<sub>2</sub> and fixed in 10 % buffered formalin. For the full  
582 body, 5-µm sagittal sections were taken at 300-µm intervals of all organs. Histopathologists Aira  
583 Nuguid and Tina Cardamome at the Australian Phenomics Network, Melbourne completed  
584 thorough examination of these sections.

### 585 **Haematological analysis**

586 Cardiac, submandibular or retro-orbital blood collected from mice at steady state (8-52 weeks old)  
587 or following challenge was placed into EDTA coated tubes. Blood cells were left undiluted or  
588 diluted 2- to 11-fold in DPBS for automated blood cell quantification using an ADVIA 2120i  
589 haematological analyser on the same day as harvest.

### 590 **Cytokine quantification**

591 All plasma was collected by centrifugation (10,000 g, 5 min) and stored at -80 °C. Lavage fluid  
592 and plasma cytokine quantities were measured by Bioplex Pro mouse cytokine 23-plex assay (Bio-  
593 Rad #M60009RDPD) according to manufacturer's instructions. When samples were denoted as  
594 '<OOR', below reference range, for a particular cytokine they were assigned the lowest recorded  
595 value for that cytokine across all samples.

### 596 **Colony forming assays**

597 Single-cell suspensions from adult bone marrow were prepared in balanced salt solution (0.15 M  
598 NaCl, 4 mM KCl, 2mM CaCl<sub>2</sub>, 1mM MgSO<sub>4</sub>, 1mM KH<sub>2</sub>PO<sub>4</sub>, 0.8 mM K<sub>2</sub>HPO<sub>4</sub>, and 15 mM N-2-  
599 hydroxyethylpiperazine-N'2-ethanesulfonic acid supplemented with 2% [v/v] bovine calf plasma).  
600 Clonal analysis of bone marrow cells (2.5 x 10<sup>4</sup>) was performed in 1 mL semisolid agar cultures  
601 of 0.3% agar in DMEM containing 20% newborn calf plasma, stem cell factor (SCF; 100 ng/mL;  
602 in-house), erythropoietin (EPO; 2 U/mL; Janssen), interleukin-3 (IL-3; 10 ng/mL; in-house), G-

603 CSF ( $10^3$  U/mL; PeproTech), granulocyte-macrophage colony stimulating factor (M-CSF;  $10^3$   
604 U/mL; in-house). Cultures were incubated at 37 °C for 7 days in a fully humidified atmosphere of  
605 10% CO<sub>2</sub> in air, then fixed, dried onto glass slides, and stained for acetylcholinesterase, luxol fast  
606 blue, haematoxylin, and the number and type of colonies were determined, blinded.

### 607 **Mouse model of *Salmonella* infection**

608 Mice used in this experiment were a mix of littermates and non-littermates aged 6-12 weeks, and  
609 wild-type mice that were littermates behaved equivalently to non-littermates. Mice were infected  
610 with *Salmonella enterica* serovar Typhimurium strain BRD509<sup>72</sup> at  $10^7$  colony forming units  
611 (CFU) by oral gavage. Mice were harvested 14 days post-infection. Cardiac bleeds were taken,  
612 and blood populations analysed using an ADVIA hematology analyser. Liver, spleen, and faeces  
613 were harvested for enumeration of viable bacteria on nutrient agar. Organs from infected mice  
614 were weighed and homogenised in 2 mL (spleens), 5 mL (livers) or 1 mL (faeces) of PBS.  
615 Homogenates were serially diluted (in duplicate) in PBS and 10 µl drops plated out in duplicate  
616 onto LB agar (+ streptomycin) and incubated overnight at 37 °C. CFU/mL was calculated per organ  
617 for each mouse and then standardised to CFU/organ based upon organ weight. A small portion  
618 (1/3) of the spleen was processed for flow cytometry analysis.

### 619 ***In vitro* Salmonella infection**

620 *In vitro* infection of BMDMs with *Salmonella enterica* serovar Typhimurium strain SL1344 were  
621 performed as previously reported (Doerflinger et al., 2020). BMDMs on day 6 of differentiation  
622 were plated at  $4 \times 10^5$  cells/well in a 6-well plate for western blot analyses or  $5 \times 10^4$  cells/well in  
623 a 96-well plate for LDH assays. Cells were infected at MOI:25 for western blot or MOI:10 or 50  
624 for LDH assays in antibiotic-free DMEM for denoted incubation times. For all experimental

625 analyses, following 30 minute incubation, cells were washed and replaced in DMEM media  
626 supplemented with 50 µg/ml gentamycin to ensure growth inhibition of extracellular bacteria.  
627 BMDM cell death levels were measured as a percentage of LDH release using the Promega  
628 CytoTox 96 Non-Radioactive Cytotoxicity Assay (G1780), according to manufacturer's  
629 instructions.

### 630 **Sublethal irradiation**

631 Mice used in this experiment were a mix of littermates and non-littermates aged 7-17 weeks, and  
632 wild-type mice that were littermates behaved equivalently to non-littermates. Mice were irradiated  
633 with a 5.5 Gy sub-lethal dose of  $\gamma$ -irradiation and received neomycin (2 mg/mL) in the drinking  
634 water for 3 weeks. At 4 days post irradiation, a retro-orbital bleed was analysed via ADVIA  
635 hematology to confirm successful irradiation. Mice had submandibular bleeds analysed by ADVIA  
636 hematology and had long bones harvested for flow cytometry analysis at either 7, 14 or 21 days  
637 post-irradiation to assess stem cell capacity.

### 638 **Hematopoietic stem cell transplants**

639 Donor bone marrow were injected intravenously into recipient *C57BL/6-CD45<sup>ly5.1</sup>* mice following  
640 11 Gy of  $\gamma$ -irradiation split over two equal doses. Recipient mice received neomycin (2 mg/mL) in  
641 the drinking water for 3 weeks. Long term capacity of stem cells was assessed by flow cytometric  
642 analysis of donor contribution to recipient mouse peripheral blood at 6 weeks.

### 643 **Zymosan-induced peritonitis**

644 Mice used in this experiment were a mix of littermates and non-littermates aged 7-17 weeks, and  
645 wild-type mice that were littermates behaved equivalently to non-littermates. 1 mg of zymosan A  
646 from *Saccharomyces cerevisiae* (Sigma-Aldrich) was intra-peritoneally injected into mice to

647 induce sterile peritonitis. After 4 or 24 hours, mice were euthanized, cardiac bled and bone marrow  
648 collected. The peritoneal cavity was washed with 1 ml of cold PBS and cells within the lavage  
649 fluid were collected by centrifugation (300 x g, 5 minutes). Bone marrow and peritoneum immune  
650 cells were quantified by flow cytometry.

## 651 **Flow cytometry**

652 To analyse the innate and adaptive immune cells in peripheral blood, inguinal lymph nodes, spleen  
653 and bone marrow, isolated single cell suspensions were incubated with a combination of the  
654 following antibodies: CD4-BV421, CD8-PECy7, CD19-PerCPCy5.5, CD11b-BV510 or BV786,  
655 GR1-PE, CD45-Alexa700, Ly6G-V450 and Ly6C-APCCy7.

656 Splenic immune cells were analysed at 14-day post *Salmonella* infection and incubated with a  
657 combination of the following antibodies: CD4-BV421, CD8-PeCy7, CD19-PerCPCy5.5, CD11b-  
658 BV510 or BV786, CD64-PE, CD45-Alexa700, Ly6G-V450 and Ly6C-APCCy7.

659 To analyse the contribution of donor and competitor cells in transplanted recipients, blood cells  
660 were incubated with either CD41-APC (ThermoFisher) and Ter119-PE or Ly5.1-A700, Ly5.2-PE-  
661 Cy7, CD4-PE, CD8-PE, B220-BV650, Ly6C-APCCy7, Mac1-PerCPCy5.5. To analyse stem- and  
662 progenitor- cell compartment following sub-lethal irradiation, bone marrow cells were incubated  
663 with cKit-PerCPe710/PerCPCy5.5 (ThermoFisher), CD48-PECy7, CD150-A647, Sca1-APCCy7,  
664 B220-PE, CD19-PE, CD4-PE, CD8-PE, Gr1-PE. To analyse the relative percentages of stem and  
665 progenitor cells at steady state, bone marrow cells were incubated with cKit-PerCPCy5.5, Sca1-  
666 A594, CD150-BV421, CD105-PE, FcγRII-PECy7, and lineage markers (B220, CD19, CD4, CD8,  
667 GR1, Ly6G, Ter119)-A700. Finally, fluorogold (AAT Bioquest Cat#17514) was added for dead



668 cell detection where appropriate. For detection of Annexin V at 21 days post-irradiation, bone  
669 marrow was incubated with Annexin V for 30 minutes.

670 Peritoneal and bone marrow immune cells at 4- or 24- hours post-zymosan injection were  
671 incubated with CD45-Alexa700, CD64-BV650, Ly6G-PE, Ly6C-APCCy7, F4/80-PerCPCy5.5,  
672 CD11b-BV510, CD8-PECy7, CD4-FITC, B220-APC and FC-blocker. Finally, propidium iodide  
673 (2  $\mu$ g/mL, Sigma-Aldrich) was added for dead cell detection.

674 All cells were analysed on the Aurora Cytex flow cytometer. With exception of zymosan induced  
675 peritonitis experiments that used the Aurora Cytex automated volume calculator, cells were mixed  
676 with counting beads to quantify absolute cell numbers. Except where denoted, all flow cytometry  
677 antibodies were obtained from BD Biosciences.

#### 678 **Reactive oxygen species (ROS) detection**

679 ROS was detected by mixing Chloromethyl-H<sub>2</sub>DCFDA dye (1 $\mu$ M; Invitrogen, #C6827) with bone  
680 marrow harvested from mice 21 days post-irradiation. Following a 30 minute incubation at 37 °C,  
681 loading buffer was removed and cells were placed into StemPro-34 plasma free medium  
682 (Thermofisher, #10639011) for 15 minute chase period. Cells were analysed using Aurora Cytex  
683 flow cytometer.

#### 684 **Liposome dye release assays**

685 Recombinant full-length human MLKL (residue 2-471) proteins were expressed in *Sf21* insect  
686 cells using bacmids prepared in DH10MultiBac *E.coli* (ATG Biosynthetics) from pFastBac Htb  
687 vectors using established procedures<sup>73</sup>. Briefly, full-length GST-tagged human MLKL proteins  
688 were purified using glutathione agarose resin (UBPBio)<sup>46</sup> followed by size-exclusion  
689 chromatography using HiLoad 16/600 Superdex 200 pg column (Cytivia). Fractions

690 corresponding to full-length human MLKL tetramers (elution volume 55-63 ml) were pooled for  
691 liposome assays. Liposomes (100 nm diameter) with a plasma membrane-like lipid mix (20%  
692 POPE, 40% POPC, 10% PI/PI(4,5)P<sub>2</sub>, 20% POPS, 10% POPG) filled with 50 mM 5(6)-  
693 Carboxyfluorescein dye (Sigma) were prepared as previously described<sup>29</sup>. Recombinant human  
694 MLKL protein was diluted to 1  $\mu$ M (2 x desired final concentration) in LUV buffer (10 mM  
695 HEPES pH 7.5, 135 mM KCl) and aliquoted into a 96 well flat-bottom plate (ThermoFisher  
696 Scientific). Liposomes were purified from excess dye using a PD-10 desalting column (Cytiva)  
697 and diluted to 20  $\mu$ M in LUV buffer. Immediately following addition of the liposomes to the plate  
698 (1:1 ratio liposomes:protein) fluorescence (485nm excitation, 535nm emission) was measured  
699 every 2 minutes for 60 minutes total on the CLARIOstar plate reader (BMG Labtech). Baseline  
700 measurements were determined by incubation of liposomes with LUV buffer alone. All assays  
701 were performed in triplicate. Data plotted as mean  $\pm$  SD of one independent repeat that is  
702 representative of three independent assays.

### 703 **Statistical analyses**

704 All data points signify independent experimental repeats or biologically independent data points.  
705 All  $p$  values were calculated in Prism using the statistical test identified in figure legends. Asterisks  
706 signify that  $p \leq 0.05$  (\*),  $p \leq 0.01$ (\*\*) or  $p \leq 0.001$  (\*\*\*)).

707

708 **REFERENCES**

- 709 1. Upton JW, Kaiser WJ, Mocarski ES. Virus inhibition of RIP3-dependent necrosis. *Cell Host*  
710 *Microbe* **7**, 302-313 (2010).
- 711  
712 2. Pearson JS, *et al.* EspL is a bacterial cysteine protease effector that cleaves RHIM proteins to block  
713 necroptosis and inflammation. *Nat Microbiol* **2**, 16258 (2017).
- 714  
715 3. Kitur K, *et al.* Necroptosis Promotes Staphylococcus aureus Clearance by Inhibiting Excessive  
716 Inflammatory Signaling. *Cell Rep* **16**, 2219-2230 (2016).
- 717  
718 4. Petrie EJ, *et al.* Viral MLKL Homologs Subvert Necroptotic Cell Death by Sequestering Cellular  
719 RIPK3. *Cell Rep* **28**, 3309-3319 e3305 (2019).
- 720  
721 5. Liu Z, *et al.* A class of viral inducer of degradation of the necroptosis adaptor RIPK3 regulates  
722 virus-induced inflammation. *Immunity* **54**, 247-258 e247 (2021).
- 723  
724 6. Weir A, Hughes S, Rashidi M, Hildebrand JM, Vince JE. Necroptotic movers and shakers: cell  
725 types, inflammatory drivers and diseases. *Curr Opin Immunol* **68**, 83-97 (2021).
- 726  
727 7. Holler N, *et al.* Fas triggers an alternative, caspase-8-independent cell death pathway using the  
728 kinase RIP as effector molecule. *Nat Immunol* **1**, 489-495 (2000).
- 729  
730 8. Thapa RJ, *et al.* Interferon-induced RIP1/RIP3-mediated necrosis requires PKR and is licensed by  
731 FADD and caspases. *Proc Natl Acad Sci U S A* **110**, E3109-3118 (2013).
- 732  
733 9. Kaiser WJ, *et al.* Toll-like receptor 3-mediated necrosis via TRIF, RIP3, and MLKL. *J Biol Chem*  
734 **288**, 31268-31279 (2013).
- 735  
736 10. He S, *et al.* Receptor interacting protein kinase-3 determines cellular necrotic response to TNF-  
737 alpha. *Cell* **137**, 1100-1111 (2009).
- 738  
739 11. He S, Liang Y, Shao F, Wang X. Toll-like receptors activate programmed necrosis in macrophages  
740 through a receptor-interacting kinase-3-mediated pathway. *Proc Natl Acad Sci U S A* **108**, 20054-  
741 20059 (2011).
- 742  
743 12. Samson AL, Garnish SE, Hildebrand JM, Murphy JM. Location, location, location: A  
744 compartmentalized view of TNF-induced necroptotic signaling. *Sci Signal* **14**, (2021).
- 745  
746 13. Li J, *et al.* The RIP1/RIP3 necrosome forms a functional amyloid signaling complex required for  
747 programmed necrosis. *Cell* **150**, 339-350 (2012).
- 748

- 749 14. Mompean M, *et al.* The Structure of the Necrosome RIPK1-RIPK3 Core, a Human Hetero-  
750 Amyloid Signaling Complex. *Cell* **173**, 1244-1253 e1210 (2018).
- 751  
752 15. Meng Y, *et al.* Human RIPK3 maintains MLKL in an inactive conformation prior to cell death by  
753 necroptosis. *Nat Commun* **12**, 6783 (2021).
- 754  
755 16. Sun L, *et al.* Mixed lineage kinase domain-like protein mediates necrosis signaling downstream of  
756 RIP3 kinase. *Cell* **148**, 213-227 (2012).
- 757  
758 17. Zhao J, *et al.* Mixed lineage kinase domain-like is a key receptor interacting protein 3 downstream  
759 component of TNF-induced necrosis. *Proceedings of the National Academy of Sciences of the*  
760 *United States of America* **109**, 5322-5327 (2012).
- 761  
762 18. Murphy JM, *et al.* The Pseudokinase MLKL Mediates Necroptosis via a Molecular Switch  
763 Mechanism. *Immunity* **39**, 443-453 (2013).
- 764  
765 19. Sethi A, *et al.* Membrane permeabilization is mediated by distinct epitopes in mouse and human  
766 orthologs of the necroptosis effector, MLKL. *Cell Death Differ*, (2022).
- 767  
768 20. Garnish SE, *et al.* Conformational interconversion of MLKL and disengagement from RIPK3  
769 precede cell death by necroptosis. *Nat Commun* **12**, 2211 (2021).
- 770  
771 21. Petrie EJ, *et al.* Identification of MLKL membrane translocation as a checkpoint in necroptotic cell  
772 death using Monobodies. *Proceedings of the National Academy of Sciences of the United States of*  
773 *America* **117**, 8468-8475 (2020).
- 774  
775 22. Samson AL, *et al.* MLKL trafficking and accumulation at the plasma membrane control the kinetics  
776 and threshold for necroptosis. *Nat Commun* **11**, 3151 (2020).
- 777  
778 23. Tanzer MC, *et al.* Evolutionary divergence of the necroptosis effector MLKL. *Cell Death Differ*  
779 **23**, 1185-1197 (2016).
- 780  
781 24. Cai Z, *et al.* Plasma membrane translocation of trimerized MLKL protein is required for TNF-  
782 induced necroptosis. *Nat Cell Biol* **16**, 55-65 (2014).
- 783  
784 25. Chen X, *et al.* Translocation of mixed lineage kinase domain-like protein to plasma membrane  
785 leads to necrotic cell death. *Cell research* **24**, 105-121 (2014).
- 786  
787 26. Dondelinger Y, *et al.* MLKL compromises plasma membrane integrity by binding to  
788 phosphatidylinositol phosphates. *Cell Rep* **7**, 971-981 (2014).
- 789

- 790 27. Hildebrand JM, *et al.* Activation of the pseudokinase MLKL unleashes the four-helix bundle  
791 domain to induce membrane localization and necroptotic cell death. *Proc Natl Acad Sci U S A* **111**,  
792 15072-15077 (2014).
- 793  
794 28. Wang HY, *et al.* Mixed Lineage Kinase Domain-like Protein MLKL Causes Necrotic Membrane  
795 Disruption upon Phosphorylation by RIP3. *Molecular Cell* **54**, 133-146 (2014).
- 796  
797 29. Sethi A, *et al.* Membrane permeabilization is mediated by distinct epitopes in mouse and human  
798 orthologs of the necroptosis effector, MLKL. *Cell Death Differ* **29**, 1804-1815 (2022).
- 799  
800 30. Zhu X, *et al.* Spontaneous necroptosis and autoinflammation are blocked by an inhibitory  
801 phosphorylation on MLKL during neonatal development. *Cell Res* **32**, 407-410 (2022).
- 802  
803 31. Tovey Crutchfield EC, Garnish SE, Hildebrand JM. The Role of the Key Effector of Necroptotic  
804 Cell Death, MLKL, in Mouse Models of Disease. *Biomolecules* **11**, (2021).
- 805  
806 32. Wu J, *et al.* Mlkl knockout mice demonstrate the indispensable role of Mlkl in necroptosis. *Cell*  
807 *research* **23**, 994-1006 (2013).
- 808  
809 33. Tovey Crutchfield EC, *et al.* MLKL deficiency protects against low-grade, sterile inflammation in  
810 aged mice. *Cell Death Differ*, (2023).
- 811  
812 34. Hildebrand JM, *et al.* A missense mutation in the MLKL brace region promotes lethal neonatal  
813 inflammation and hematopoietic dysfunction. *Nat Commun* **11**, 3150 (2020).
- 814  
815 35. Zhang J, Jin T, Aksentijevich I, Zhou Q. RIPK1-Associated Inborn Errors of Innate Immunity.  
816 *Front Immunol* **12**, 676946 (2021).
- 817  
818 36. Garnish SE, Hildebrand JM. Rare catastrophes and evolutionary legacies: human germline gene  
819 variants in MLKL and the necroptosis signalling pathway. *Biochem Soc Trans* **50**, 529-539 (2022).
- 820  
821 37. Faergeman SL, *et al.* A novel neurodegenerative spectrum disorder in patients with MLKL  
822 deficiency. *Cell Death Dis* **11**, 303 (2020).
- 823  
824 38. Wang B, *et al.* A rare variant in MLKL confers susceptibility to ApoE varepsilon4-negative  
825 Alzheimer's disease in Hong Kong Chinese population. *Neurobiol Aging* **68**, 160 e161-160 e167  
826 (2018).
- 827  
828 39. Hildebrand JM, *et al.* A family harboring an MLKL loss of function variant implicates impaired  
829 necroptosis in diabetes. *Cell Death Dis* **12**, 345 (2021).
- 830  
831 40. Karczewski KJ, *et al.* The mutational constraint spectrum quantified from variation in 141,456  
832 humans. *Nature* **581**, 434-443 (2020).

- 833  
834 41. Huang Z, *et al.* Calpastatin prevents NF-kappaB-mediated hyperactivation of macrophages and  
835 attenuates colitis. *J Immunol* **191**, 3778-3788 (2013).
- 836  
837 42. Cortes A, *et al.* Major histocompatibility complex associations of ankylosing spondylitis are  
838 complex and involve further epistasis with ERAP1. *Nat Commun* **6**, 7146 (2015).
- 839  
840 43. Strange A, *et al.* A genome-wide association study identifies new psoriasis susceptibility loci and  
841 an interaction between HLA-C and ERAP1. *Nat Genet* **42**, 985-990 (2010).
- 842  
843 44. Robinson PC, *et al.* ERAP2 is associated with ankylosing spondylitis in HLA-B27-positive and  
844 HLA-B27-negative patients. *Ann Rheum Dis* **74**, 1627-1629 (2015).
- 845  
846 45. Tsoi LC, *et al.* Identification of 15 new psoriasis susceptibility loci highlights the role of innate  
847 immunity. *Nat Genet* **44**, 1341-1348 (2012).
- 848  
849 46. Petrie EJ, *et al.* Conformational switching of the pseudokinase domain promotes human MLKL  
850 tetramerization and cell death by necroptosis. *Nat Commun* **9**, 2422 (2018).
- 851  
852 47. Wang H, *et al.* Mixed lineage kinase domain-like protein MLKL causes necrotic membrane  
853 disruption upon phosphorylation by RIP3. *Mol Cell* **54**, 133-146 (2014).
- 854  
855 48. Rodriguez DA, *et al.* Characterization of RIPK3-mediated phosphorylation of the activation loop  
856 of MLKL during necroptosis. *Cell Death Differ* **23**, 76-88 (2016).
- 857  
858 49. Martin KR, *et al.* Transgenic Mice Expressing Human Proteinase 3 Exhibit Sustained Neutrophil-  
859 Associated Peritonitis. *J Immunol* **199**, 3914-3924 (2017).
- 860  
861 50. Key FM, *et al.* Emergence of human-adapted *Salmonella enterica* is linked to the Neolithization  
862 process. *Nat Ecol Evol* **4**, 324-333 (2020).
- 863  
864 51. Hohmann EL. Nontyphoidal salmonellosis. *Clin Infect Dis* **32**, 263-269 (2001).
- 865  
866 52. Galan JE. *Salmonella* Typhimurium and inflammation: a pathogen-centric affair. *Nat Rev*  
867 *Microbiol* **19**, 716-725 (2021).
- 868  
869 53. Wemyss MA, Pearson JS. Host Cell Death Responses to Non-typhoidal *Salmonella* Infection.  
870 *Front Immunol* **10**, 1758 (2019).
- 871  
872 54. Liu Z, *et al.* Oligomerization-driven MLKL ubiquitylation antagonizes necroptosis. *EMBO J* **40**,  
873 e103718 (2021).
- 874

- 875 55. Yoon S, Bogdanov K, Wallach D. Site-specific ubiquitination of MLKL targets it to endosomes  
876 and targets Listeria and Yersinia to the lysosomes. *Cell Death Differ*, (2022).
- 877  
878 56. Gutierrez-Arcelus M, Rich SS, Raychaudhuri S. Autoimmune diseases - connecting risk alleles  
879 with molecular traits of the immune system. *Nat Rev Genet* **17**, 160-174 (2016).
- 880  
881 57. Ramos PS, Shedlock AM, Langefeld CD. Genetics of autoimmune diseases: insights from  
882 population genetics. *J Hum Genet* **60**, 657-664 (2015).
- 883  
884 58. Werren EA, Garcia O, Bigham AW. Identifying adaptive alleles in the human genome: from  
885 selection mapping to functional validation. *Hum Genet* **140**, 241-276 (2021).
- 886  
887 59. Brinkworth JF, Valizadegan N. Sepsis and the evolution of human increased sensitivity to  
888 lipopolysaccharide. *Evol Anthropol* **30**, 141-157 (2021).
- 889  
890 60. Boomer JS, *et al.* Immunosuppression in patients who die of sepsis and multiple organ failure.  
891 *JAMA* **306**, 2594-2605 (2011).
- 892  
893 61. Karunakaran D, *et al.* RIPK1 gene variants associate with obesity in humans and can be  
894 therapeutically silenced to reduce obesity in mice. *Nat Metab* **2**, 1113-1125 (2020).
- 895  
896 62. Boisson-Dupuis S, *et al.* Tuberculosis and impaired IL-23-dependent IFN-gamma immunity in  
897 humans homozygous for a common TYK2 missense variant. *Sci Immunol* **3**, (2018).
- 898  
899 63. Kerner G, *et al.* Human ancient DNA analyses reveal the high burden of tuberculosis in Europeans  
900 over the last 2,000 years. *Am J Hum Genet* **108**, 517-524 (2021).
- 901  
902 64. Rickard JA, *et al.* RIPK1 regulates RIPK3-MLKL-driven systemic inflammation and emergency  
903 hematopoiesis. *Cell* **157**, 1175-1188 (2014).
- 904  
905 65. Rickard JA, *et al.* TNFR1-dependent cell death drives inflammation in Sharpin-deficient mice. *Elife*  
906 **3**, (2014).
- 907  
908 66. Pierdomenico M, *et al.* Necroptosis is active in children with inflammatory bowel disease and  
909 contributes to heighten intestinal inflammation. *Am J Gastroenterol* **109**, 279-287 (2014).
- 910  
911 67. Yan B, *et al.* Discovery of a new class of highly potent necroptosis inhibitors targeting the mixed  
912 lineage kinase domain-like protein. *Chem Commun (Camb)* **53**, 3637-3640 (2017).
- 913  
914 68. Wang H, *et al.* One-step generation of mice carrying mutations in multiple genes by CRISPR/Cas-  
915 mediated genome engineering. *Cell* **153**, 910-918 (2013).
- 916

- 917 69. Samson AL, *et al.* A toolbox for imaging RIPK1, RIPK3, and MLKL in mouse and human cells.  
918 *Cell Death Differ*, (2021).
- 919  
920 70. Bossen C, *et al.* Interactions of tumor necrosis factor (TNF) and TNF receptor family members in  
921 the mouse and human. *J Biol Chem* **281**, 13964-13971 (2006).
- 922  
923 71. Vince JE, *et al.* IAP antagonists target cIAP1 to induce TNFalpha-dependent apoptosis. *Cell* **131**,  
924 682-693 (2007).
- 925  
926 72. Strugnell R, *et al.* Characterization of a *Salmonella typhimurium* aro vaccine strain expressing the  
927 P.69 antigen of *Bordetella pertussis*. *Infect Immun* **60**, 3994-4002 (1992).
- 928  
929 73. Fitzgibbon C, Meng Y, Murphy JM. Co-expression of recombinant RIPK3:MLKL complexes  
930 using the baculovirus-insect cell system. *Methods Enzymol* **667**, 183-227 (2022).
- 931  
932 74. Su L, Quade B, Wang H, Sun L, Wang X, Rizo J. A plug release mechanism for membrane  
933 permeation by MLKL. *Structure* **22**, 1489-1500 (2014).
- 934  
935 75. Murphy JM, *et al.* Insights into the evolution of divergent nucleotide-binding mechanisms among  
936 pseudokinases revealed by crystal structures of human and mouse MLKL. *Biochem J* **457**, 369-377  
937 (2014).

938

## 939 **ACKNOWLEDGEMENTS**

940 We thank all the following people for their technical assistance; Aira Nuguid and Tina Cardamone  
941 (Phenomix Australia Histopathology and Slide Scanning Service- The University of Melbourne).  
942 WEHI Cytometry Facility, WEHI Antibody Facility, WEHI Centre for Dynamic Imaging, WEHI  
943 Bioservices, Cheree Fitzgibbon (WEHI), Jacinta Hansen (WEHI) and Matthew Cook (ANU). The  
944 generation of *Mkl<sup>S131P</sup>* mice by CRISPR/Cas9 gene editing was performed by Andrew Kueh and  
945 Marco Herold (WEHI MAGEC laboratory) supported by the Australian Phenomics Network  
946 (APN) and the Australian Government through the National Collaborative Research Infrastructure  
947 Strategy (NCRIS) program. We thank Warren Alexander and Melanie Bahlo for the provision of  
948 important resources and expertise. We thank Michael Hildebrand and Tom Witkowski from  
949 Epilepsy Research Centre, Department of Medicine, Austin Health for assistance with Sanger



950 sequencing. We are grateful to the National Health and Medical Research Council for fellowship  
951 (J.M.H., 1142669; A.L.S., 2002965; J.M.M., 1172929; J.S., 1107149), grant (J.M.M., 1105023;  
952 K.R.M., 1092602; J.S., 1105023; J.M.H., 2011584) and infrastructure (IRIIS 9000719); Arthritis  
953 Australia support to K.R.M; K.E.L funding by Future Fellowships from the ARC (FT19010266).  
954 We acknowledge scholarship support for S.E.G, Y.M, D.F and A.V.J (Australian Government  
955 Research Training Program Stipend Scholarships), S.E.G (Wendy Dowsett Scholarship), S.C  
956 (Walter and Eliza Hall Handman PhD Scholarship). Victorian State Government Operational  
957 Infrastructure Support Scheme.

## 958 **AUTHOR INFORMATION**

### 959 **The Walter and Eliza Hall Institute of Medical Research, Parkville, VIC, 3052, Australia**

960 Sarah E. Garnish, Katherine R. Martin, Maria Kauppi, Victoria Jackson, Shene Chiou, Yanxiang  
961 Meng, Daniel Frank, Emma C. Tovey Crutchfield, Komal M. Patel, Annette V. Jacobsen, Georgia  
962 K. Atkin-Smith, Ladina Di Rago, Marcel Doerflinger, Christopher R. Horne, Cathrine Hall,  
963 Samuel N. Young, Ian P. Wicks, Ashley P. Ng, Charlotte Slade, Andre L. Samson, John Silke,  
964 James M. Murphy and Joanne M. Hildebrand

### 965 **Department of Medical Biology, University of Melbourne, Parkville, VIC, 3052, Australia**

966 Sarah E. Garnish, Katherine R. Martin, Maria Kauppi, Shene Chiou, Yanxiang Meng, Komal M.  
967 Patel, Annette V. Jacobsen, Georgia K. Atkin-Smith, Ladina Di Rago, Marcel Doerflinger,  
968 Christopher R. Horne, Ian P. Wicks, Charlotte Slade, Andre L. Samson, John Silke, James M.  
969 Murphy and Joanne M. Hildebrand

### 970 **Centre for Innate Immunity and Infectious Diseases, Hudson Institute of Medical Research,**

971 **Clayton, VIC, 3168, Australia**

- 972 Rebecca Ambrose, Vik Ven Eng and Jaclyn S. Pearson
- 973 **Department of Molecular and Translational Science, Monash University, Clayton, VIC,**  
974 **3168, Australia**
- 975 Rebecca Ambrose, Vik Ven Eng, Kate E. Lawlor and Jaclyn S. Pearson
- 976 **Department of Microbiology, Monash University, Clayton, VIC, 3168, Australia**
- 977 Jaclyn S. Pearson
- 978 **University of Melbourne, Faculty of Medicine, Dentistry and Health Sciences, Parkville,**  
979 **3052, Australia**
- 980 Emma C. Tovey-Crutchfield
- 981 **Department of Immunology and Infection, John Curtin School of Medical Research,**  
982 **Australian National University, ACT, Australia**
- 983 Vicki Athanasopoulos and Carola Vinuesa
- 984 **Institute of Virology, Technical University of Munich/Helmholtz Munich, Munich, Germany**
- 985 Gregor Ebert
- 986 **Clinical Haematology Department, The Royal Melbourne Hospital and Peter MacCallum**  
987 **Cancer Centre, Parkville, 3052, Australia**
- 988 Ashley P. Ng
- 989 **Department of Clinical Immunology and Allergy, Royal Melbourne Hospital, Parkville, VIC,**  
990 **3052, Australia**

991 Charlotte A. Slade

992 **Contributions**

993 Conceptualization: S.E.G., J.S., J.M.M., J.M.H. Methodology: S.E.G., K.R.M., M.K., V.J., R.A.,  
994 V.E., S.C., Y.M., D.F., E.C.T., K.M.P., A.V.J., G.K.A., L.D., M.D., C.R.H., C.H., S.N.Y., G.E.,  
995 A.P.N., J.S.P., A.L.S., K.E.L., J.M.H. Resources: K.R.M., M.K., V.A., C.V., C.S., J.S.P., J.S.,  
996 J.M.M., J.M.H. Supervision: K.M., M.K., J.S., J.M.M., J.M.H. Funding acquisition: J.S., J.M.M.,  
997 J.M.H.

998 S.E.G and J.M.H co-wrote the paper with input from authors.

999

1000 **Data Availability**

1001 The biological tools generated for MLKL during this study are available from the corresponding  
1002 authors on reasonable request.

1003

1004 **ETHICS DECLARATIONS**

1005 Competing interests: S.E.G, K.M.P, A.L.S, C.R.H, S.N.Y, J.S, J.M.M and J.M.H contribute, or  
1006 have contributed, to a project developing necroptosis inhibitors in collaboration with Anaxis Pty  
1007 Ltd. K.R.M received funding from CSL Pty Ltd. The remaining authors declare no competing  
1008 interests.

1009 **FIGURE LEGENDS**

1010 **Figure 1. MLKL<sup>S132P</sup> executes cell death in the presence of necrosulfonamide or Ser83**  
1011 **inhibition.**

1012 (A) Minor allele frequency of *MLKL p.Ser132Pro* according to the gnomAD database, stratified  
1013 by ancestry. (B) Sequence alignment of conserved serine in the MLKL orthologs across different  
1014 species. (C) MLKL<sup>WT</sup>, MLKL<sup>S132P</sup> and MLKL<sup>TSEE</sup> expression was induced in *MLKL*<sup>-/-</sup> HT29 cells  
1015 with 100 ng/ml doxycycline (Dox) and treated with necroptotic stimulus (TNF, Smac mimetic,  
1016 IDN-6556; TSI) in the presence or absence of MLKL inhibitor Necrosulfonamide (NSA; 1μM).  
1017 Cell death was measured every hour for 24 hours by percentage of SYTOX Green positive cells  
1018 quantified using IncuCyte SX5 live cell imaging. Independent cell lines were assayed in *n*=3-9  
1019 experiments, with errors bars indicating the mean ± SEM. (D) Western blot analyses of whole cell  
1020 lysates taken 3h post TSI stimulation in the presence or absence of NSA from doxycycline (100  
1021 ng/ml) induced *MLKL*<sup>-/-</sup> HT29 cells expressing *MLKL*<sup>WT</sup> or *MLKL*<sup>S132P</sup>. (E) High molecular weight  
1022 phosphorylated MLKL<sup>S132P</sup> is present at enhanced levels in crude membrane fractions following  
1023 Blue-Native PAGE under TSI stimulation in the presence or absence of NSA. (F) S83 (red), C86  
1024 (purple) and S132 (gold) highlighted as spheres on cartoon representation of human MLKL. Four-  
1025 helix bundle domain shown in green, brace helices shown in beige and pseudokinase domain  
1026 shown in blue. Homology model is generated from PDB:2MSV and PDB: 4MWI of human  
1027 MLKL, which were aligned using the full-length murine crystal structure (PDB:4BTF)<sup>18, 74, 75</sup>. (G)  
1028 *MLKL S132P* mutation reconstitutes necroptotic signaling in the presence of S83 inhibitory  
1029 phosphorylation (MLKL<sup>S83D</sup>). Human MLKL expression was induced in *MLKL*<sup>-/-</sup> HT29 cells with  
1030 doxycycline (100 ng/ml) and treated TSI in the presence or absence of NSA (1μM). Cell death  
1031 was measured every hour for 23 hours by percentage of SYTOX Green positive cells quantified

1032 using IncuCyte SX5 live cell imaging. Independent cell lines were assayed in  $n=4$  experiments,  
1033 with errors bars indicating the mean  $\pm$  SEM. **(H)** Liposome dye release assays using 0.5  $\mu$ M  
1034 recombinant full-length MLKL<sup>WT</sup>, MLKL<sup>S132P</sup>, MLKL<sup>S83D</sup> and MLKL<sup>S83D,S132P</sup>. Release of 5(6)-  
1035 Carboxyfluorescein was measured by fluorescence (485 nm excitation wavelength, 535 nm  
1036 emission wavelength) every 2 min over 60 min. Data represent mean  $\pm$  SD of triplicate  
1037 measurements, representative of three independent assays. **(D/E)** Blot images are representative  
1038 of at least three independent experiments.

## Figure 1

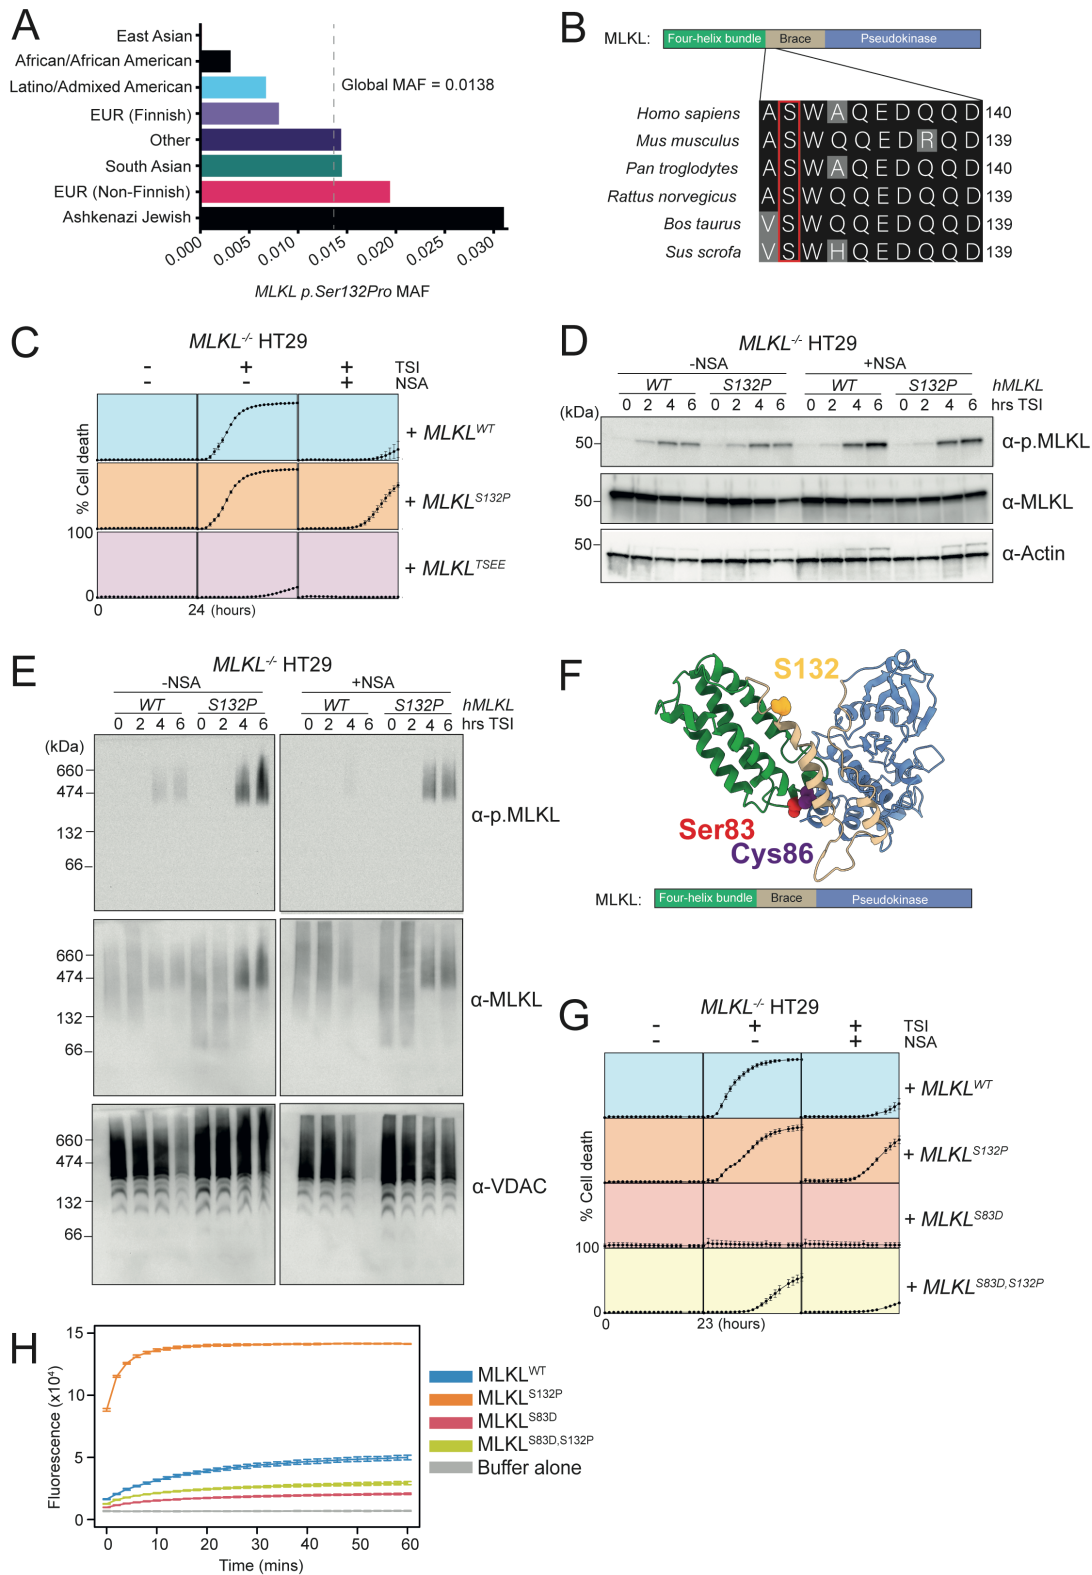

1039 **Figure 2. In mice, *Mikl*<sup>S131P</sup> homozygosity is tolerated but results in steady state immune cell**  
1040 **population differences.**

1041 **(A)** Macroscopic appearance of *Mikl*<sup>WT/WT</sup> and *Mikl*<sup>S131P/S131P</sup> mice at 8-12 weeks of age. **(B)**  
1042 *Mikl*<sup>S131P/S131P</sup> mice are born according to Hardy-Weinberg equilibrium as observed in the  
1043 distribution of genotypes from *Mikl*<sup>WT/S131P</sup> heterozygous intercrosses. **(C)** Body weight of  
1044 *Mikl*<sup>WT/WT</sup>, *Mikl*<sup>WT/S131P</sup> and *Mikl*<sup>S131P/S131P</sup> mice at 3-4 or 7-9 months of age. Each dot represents an  
1045 individual mouse ( $n = 8-17$ , mean  $\pm$  SEM). **(D-F)** Flow cytometry quantification of innate (Ly6C<sup>hi</sup>  
1046 monocytes, Ly6C<sup>lo</sup> monocytes and neutrophils) and adaptive (CD4<sup>+</sup> T cells, CD8<sup>+</sup> T cells and B  
1047 cells) in the bone marrow **(D)**, spleen **(E)** and inguinal lymph nodes **(F)** of 8–12-week-old *Mikl*<sup>WT/WT</sup>,  
1048 *Mikl*<sup>WT/S131P</sup>, and *Mikl*<sup>S131P/S131P</sup> mice. Each symbol represents one individual mouse sampled and  
1049 error bars represent mean  $\pm$  SEM for  $n = 7-11$  mice as indicated. **(G)** Multiplex measurement of  
1050 plasma cytokines from 6-12 week old mice. Each symbol represents one individual mouse  
1051 sampled, with mean  $\pm$  SEM of  $n = 4-8$ . **(H)** Type and number of colonies from 25,000  
1052 unfractionated bone marrow cells cultured in G-CSF (10<sup>3</sup> U/mL), GM-CSF (10<sup>3</sup> U/mL), SIE [SCF  
1053 (100 ng/mL), IL-3 (10 ng/mL), EPO (2 U/mL)] were scored after 7 days. Error bars represent mean  
1054  $\pm$  SEM for  $n = 4$  mice per genotype. **(I, J)** Immortalized mouse dermal fibroblasts (MDFs) were  
1055 isolated from *Mikl*<sup>WT/WT</sup>, *Mikl*<sup>WT/S131P</sup>, and *Mikl*<sup>S131P/S131P</sup> mice and stimulated as indicated for 24  
1056 hours for quantification of PI-positive cells using IncuCyte S3 live cell imaging **(I)** or for 6 hours  
1057 for western blot analysis **(J)**. Death data represent mean  $\pm$  SEM for independently generated cell  
1058 lines of  $n = 3-5$ . \* $p < 0.05$ , \*\* $p < 0.01$  calculated using an unpaired, two-tailed Students t-test.

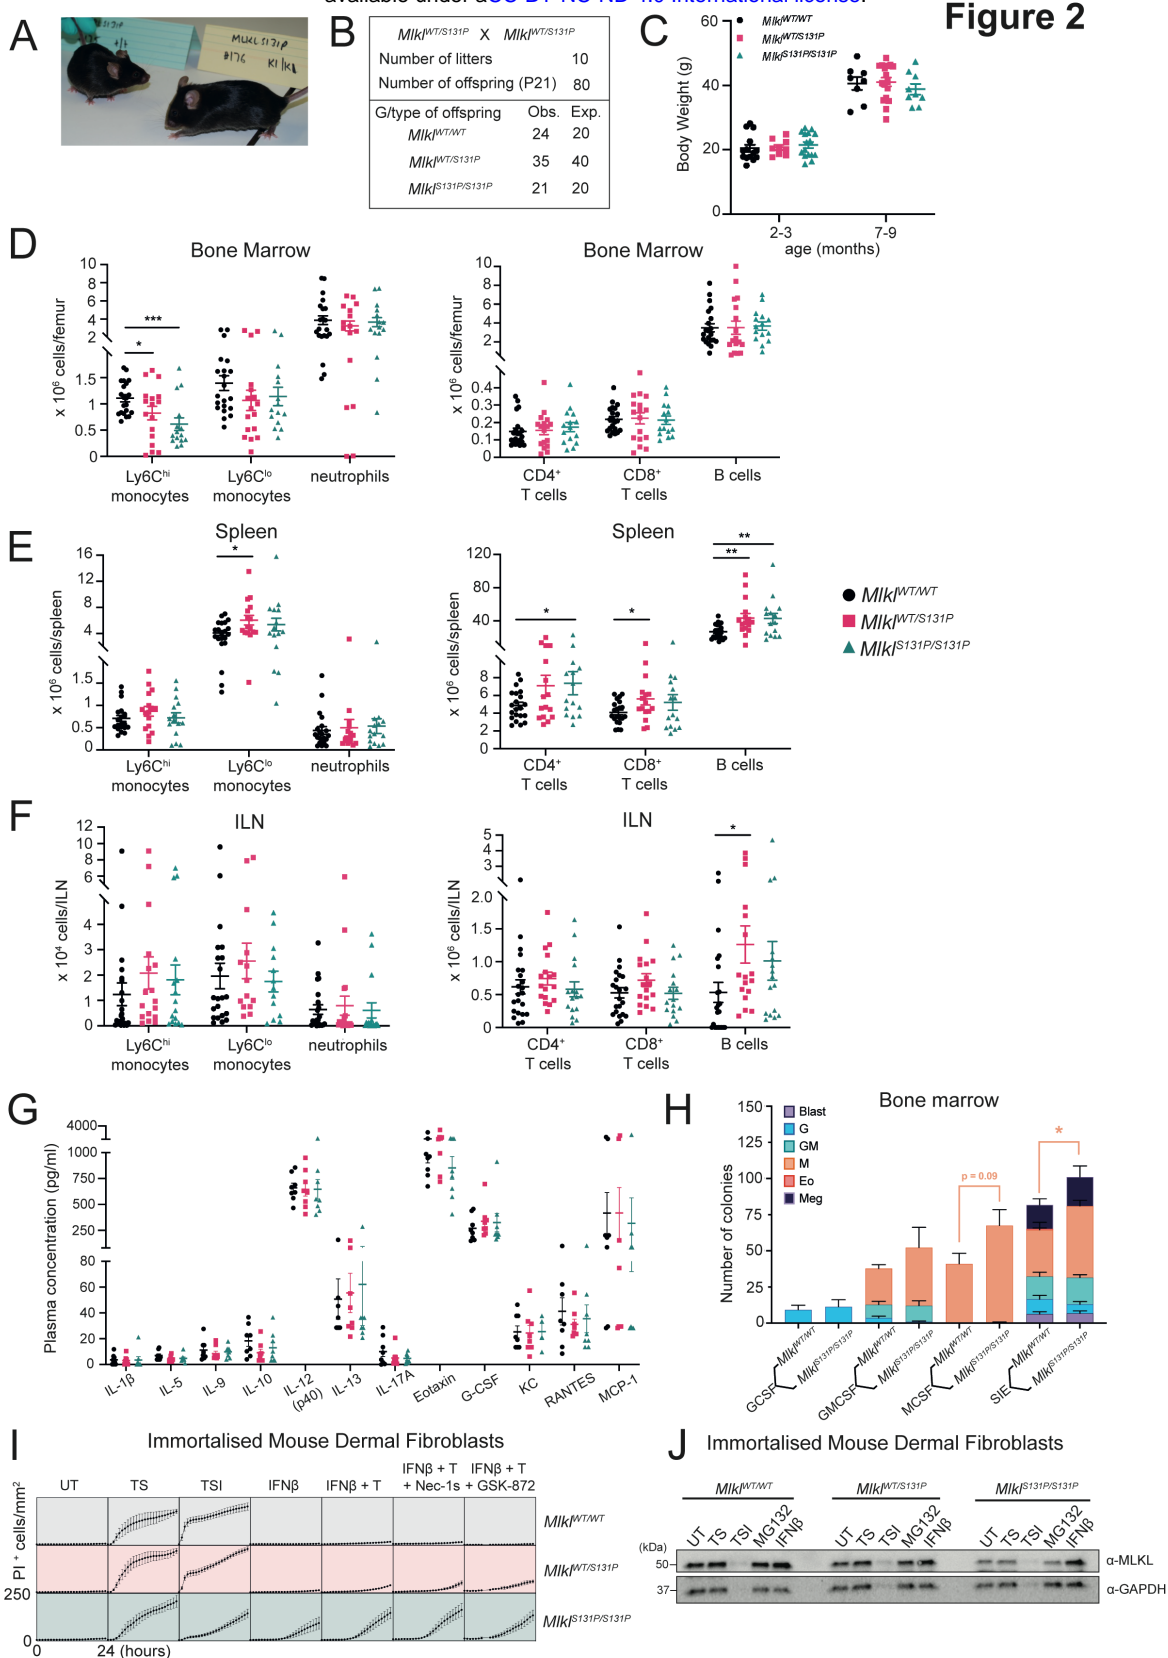



1059 **Figure 3. *Mkl*<sup>S131P</sup> mice show delayed recovery from myelosuppressive irradiation.**

1060 Peripheral red blood cells (A), platelets (B) and monocytes (C) in *Mkl*<sup>WT/WT</sup>, *Mkl*<sup>WT/S131P</sup>, and  
1061 *Mkl*<sup>S131P/S131P</sup> mice following treatment with 5.5 Gy radiation. Quantified nucleated viable cells  
1062 (D), progenitor (E) and LSK (F) populations in the bone marrow of mice after myelosuppressive  
1063 radiation. (G) Multiplex measurement of plasma G-CSF levels at 7, 14 and 21 days post-  
1064 myelosuppressive radiation. Each symbol represents one individual mouse sampled, with mean ±  
1065 SEM of *n*=2-5 independent mice from two separate experiments. Bone marrow from *Mkl*<sup>WT/WT</sup>,  
1066 *Mkl*<sup>WT/S131P</sup> or *Mkl*<sup>S131P/S131P</sup> mice on CD45<sup>Ly5.2</sup> background was mixed with wild-type GFP<sup>+</sup>  
1067 competitor bone marrow on a CD45<sup>Ly5.2</sup> background and transplanted into irradiated CD45<sup>Ly5.1</sup>  
1068 recipients. (H) Relative donor contribution to PBMCs was assessed at 6 weeks post-  
1069 transplantation. Mean shown of *n*=5-11 recipients, with each donor bone marrow placed into 2-3  
1070 recipients. Host contribution (CD45<sup>Ly5.1</sup>) depicted in pink, GFP competitor in green and test  
1071 (*Mkl*<sup>WT/WT</sup>, *Mkl*<sup>WT/S131P</sup> or *Mkl*<sup>S131P/S131P</sup>) in purple. \**p*<0.05, \*\**p*<0.01, \*\*\**p*<0.001 calculated  
1072 using an unpaired, two-tailed Students t-test (A-G).

**Figure 3**

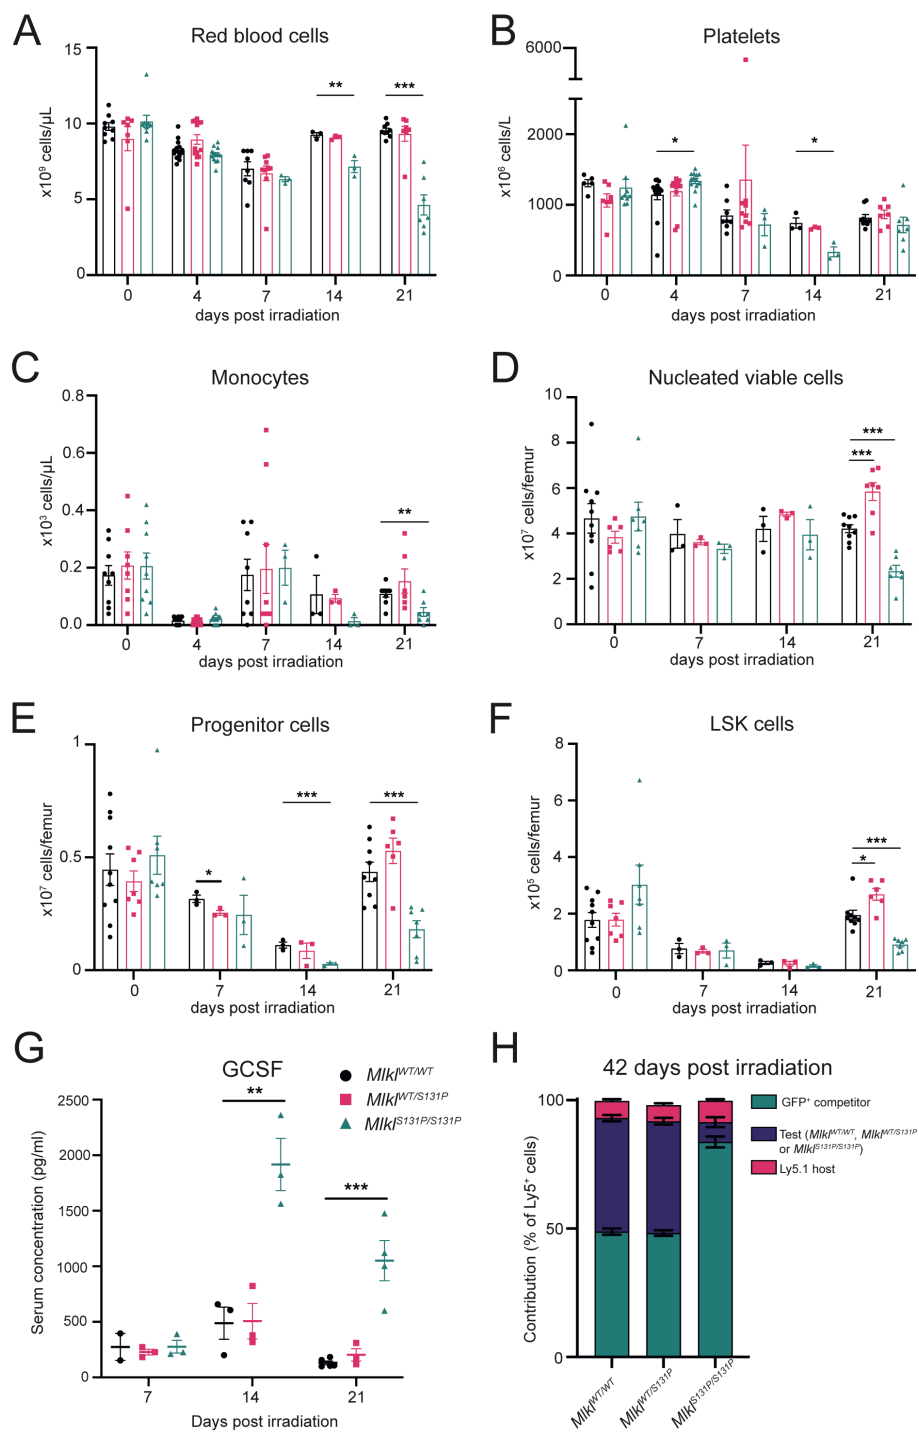

1073 **Figure 4. *Mkl1*<sup>S131P</sup> recruited inflammatory neutrophils are less sensitive to TNF-induced**  
1074 **necroptosis.**

1075 **(A-D)** Flow cytometry quantification of peritoneal innate (macrophages, Ly6C<sup>hi</sup> monocytes,  
1076 Ly6C<sup>lo</sup> monocytes and neutrophils) and adaptive (CD4<sup>+</sup> T cells, CD8<sup>+</sup> T cells and B cells) immune  
1077 cells at 4- **(A, B)** or 24- **(C, D)** hours post zymosan injection. ADVIA hematology quantification  
1078 of circulating immune cells (lymphocytes, neutrophils and monocytes) at 4- **(E)** and 24- **(F)** hours  
1079 post zymosan injection. **(G)** Multiplex measurement of IL-13, IL-17A, MCP-1 and Eotaxin  
1080 cytokine levels in peritoneal lavage at 4 hours post-zymosan injection. **(A-G)** Each symbol  
1081 represents one independent animal, with mice from the 4- or 24-hour timepoint pooled from 3 and  
1082 2 independent zymosan experiments respectively. Error bars represent mean  $\pm$  SEM for  $n=3-14$   
1083 mice as indicated **(A-G)**. Evaluation of induced necroptotic signaling **(H)** in neutrophils recruited  
1084 and isolated from the peritoneum 4 hours post-zymosan injection. Neutrophils were treated with  
1085 necroptotic stimulus (TNF, Smac mimetic, IDN-6556; TSI) for 16 hours and cell death was  
1086 measured every hour by percentage of SYTOX Green positive cells quantified using IncuCyte  
1087 SX5 live cell imaging. Data were collected from one independent experiment with male and female  
1088 data pooled, neutrophils isolated from independent mice with mean  $\pm$  SEM of  $n=6-14$  presented.  
1089 \*\*\* $p < 0.001$  calculated using an unpaired, two-tailed Students t-test.

**Figure 4**

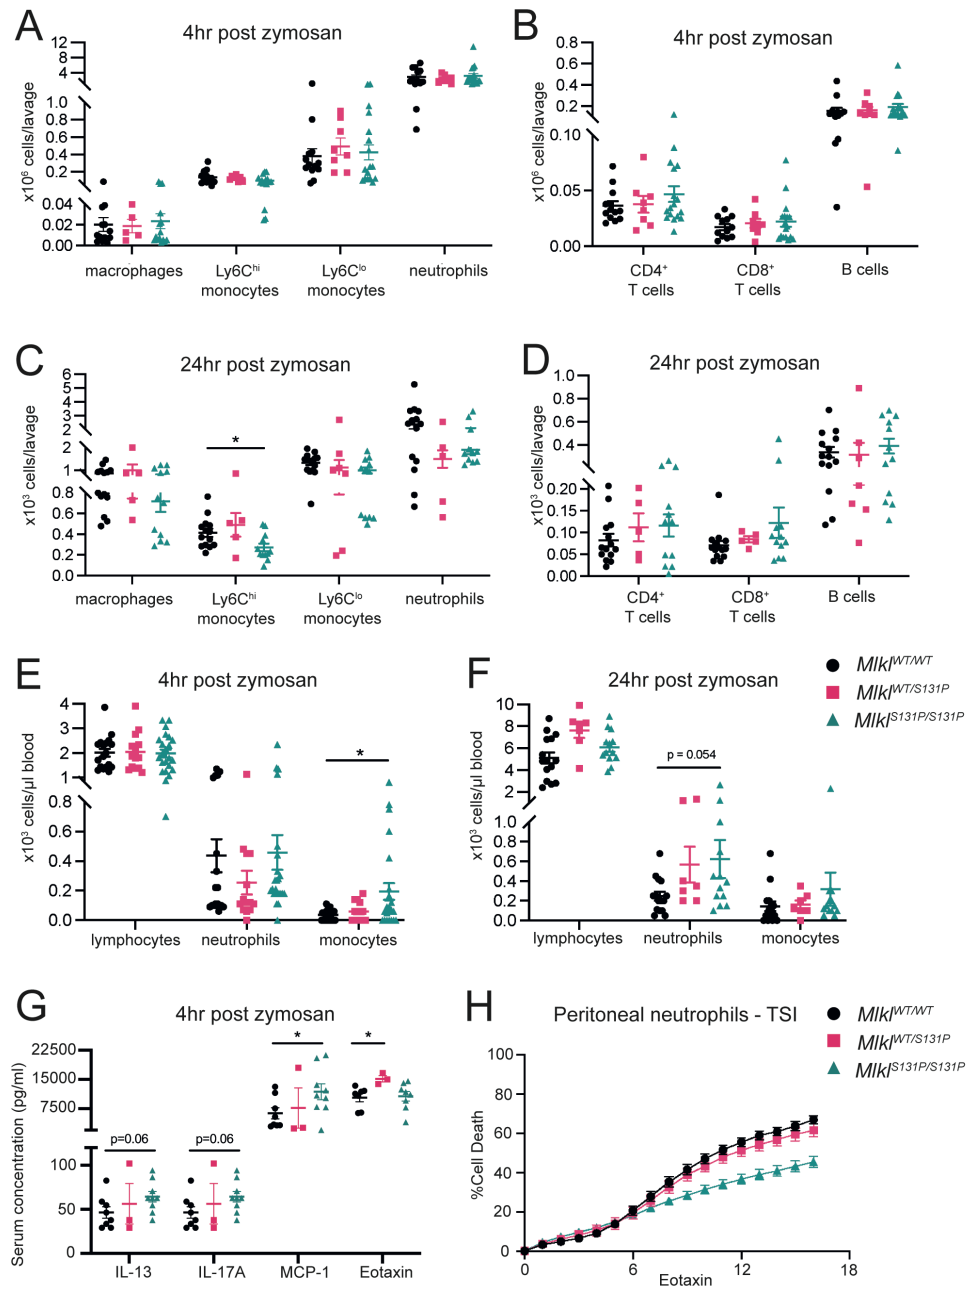

1090 **Figure 5. *Mkl<sup>S131P</sup>* homozygote mice exhibit bacterial clearance defects following oral**  
1091 ***Salmonella* infection.**

1092 **(A)** ZO-1 (yellow) and CD68 (purple) staining in epithelial barrier of intestinal sections taken at  
1093 14 days post-*Salmonella* infection. **(B)** Increased bacterial burden observed in spleen and liver, but  
1094 not feces in *Mkl<sup>S131P/S131P</sup>* mice at infection endpoint. Quantification of circulating white blood  
1095 cells (lymphocytes, neutrophils and monocytes) using ADVIA hematology **(C)** and splenic  
1096 adaptive (CD4<sup>+</sup> T cells, CD8<sup>+</sup> T cells and B cells) and innate (macrophages, Ly6C<sup>hi</sup> monocytes,  
1097 Ly6C<sup>lo</sup> monocytes and neutrophils) immune cells using flow cytometry **(D, E)**. **(F, G)** Multiplex  
1098 measurement of plasma cytokine levels at 14-days post *Salmonella* infection. *Salmonella* infection  
1099 was performed on 3 independent occasions, with each symbol representing an individual mouse  
1100 sampled. Error bars represent mean  $\pm$  SEM for  $n=5-16$  as indicated. \* $p<0.05$ , \*\* $p<0.01$ ,  
1101 \*\*\* $p<0.001$  calculated using a Mann-Whitney test **(B)** or an unpaired, two-tailed Students t-test  
1102 **(C-G)**.

## Figure 5

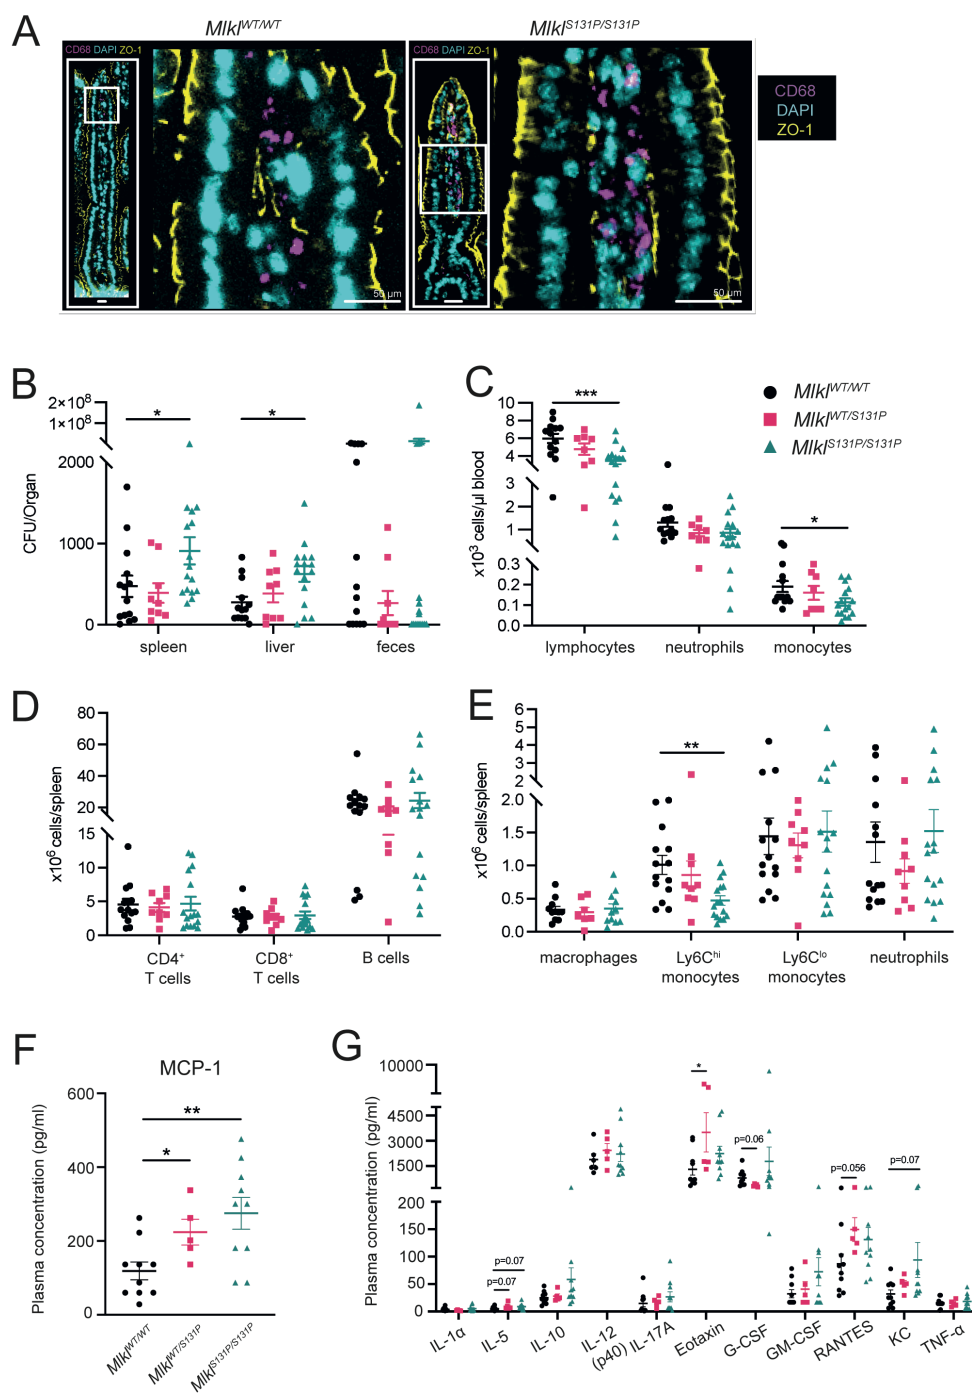

## SUPPLEMENTARY FIGURES

### Supplementary Figure 1. $MLKL^{S132P}$ is less sensitive to inhibition by necrosulfonamide.

(A) Family pedigree of patient 2, identified from the Australian registry of patients suffering from immune related disease. Known diagnoses for family members are indicated. (B) Peripheral blood mononuclear cells (PBMCs) isolated from patient 2 and an aged matched healthy donor control were stimulated as indicated for 4 hours for western blot analysis. (C) ELISA measurement of supernatant TNF in PBMCs stimulated with LPS or Poly I:C for 5 hours. Mean of technical triplicates presented. (D-G) Evaluation of necroptotic signaling by  $MLKL^{WT}$ ,  $MLKL^{S132P}$  and  $MLKL^{TSEE}$  in  $MLKL^{-/-}$  (D) or WT (E) HT29 cells and WT (F) or  $MLKL^{-/-}$  (G) U937 cells. Human  $MLKL$  expression was induced with doxycycline (Dox) and treated with necroptotic stimulus (TNF, Smac mimetic, IDN-6556; TSI) in the presence or absence of  $MLKL$  inhibitor necrosulfonamide (NSA; 1  $\mu$ M). Cell death was measured every hour for 24 hours by percentage of SYTOX Green positive cells quantified using IncuCyte SX5 or S3 live cell imaging. Independent cell lines were assayed in  $n=2-9$  experiments, with errors bars indicating the mean  $\pm$  SEM. (H, I) Western blot analyses of whole cell lysates of doxycycline induced WT or  $MLKL^{-/-}$  HT29 (H) or U937 (I) cells expressing  $MLKL^{WT}$ ,  $MLKL^{S132P}$  or  $MLKL^{TSEE}$ . (J) Blue-Native PAGE crude cytoplasm fractions of  $MLKL^{-/-}$  HT29 cells under TSI stimulation (0-6 hours) in the presence or absence of NSA. (K) Western blot analyses of whole cell lysates taken 5 h post TSI stimulation in the presence or absence of NSA from doxycycline induced  $MLKL^{-/-}$  HT29 cells expressing  $MLKL^{WT}$ ,  $MLKL^{S132P}$ ,  $MLKL^{S83D}$  or  $MLKL^{S83D,S132P}$ . (L, M) Evaluation of necroptotic signaling in WT (L) or  $MLKL^{-/-}$  (M) HT29 cells expressing  $MLKL^{WT}$ ,  $MLKL^{S132P}$ ,  $MLKL^{S83D}$ ,  $MLKL^{S83D,S132P}$ ,  $MLKL^{S83C}$ ,  $MLKL^{R82S}$  or  $MLKL^{R82S,S132P}$ . Human  $MLKL$  expression was induced with doxycycline (Dox) and cells treated with TSI in the presence or absence of NSA. Cell death was measured every hour for 23 hours by percentage of SYTOX-green positive cells quantified using IncuCyte SX5 or S3

bioRxiv preprint doi: <https://doi.org/10.1101/2022.09.08.507056>; this version posted March 16, 2023. The copyright holder for this preprint (which was not certified by peer review) is the author/funder, who has granted bioRxiv a license to display the preprint in perpetuity. It is made available under a [CC-BY-NC-ND 4.0 International license](#).

live cell imaging. Independent cell lines were assayed in  $n=4$  experiments, with errors bars indicating the mean  $\pm$  SEM. **(N)** Western blot analyses of whole cell lysates taken in the presence or absence of 3 h post TSI stimulation from doxycycline induced *MLKL*<sup>-/-</sup> HT29 cells expressing *MLKL*<sup>WT</sup>, *MLKL*<sup>S132P</sup>, *MLKL*<sup>S83C</sup>, *MLKL*<sup>R82S</sup>, or *MLKL*<sup>R82S,S132P</sup>. Blots images in **B**, **H**, **I**, **J**, **K** & **N** are representative images of at least two independent repeat experiments.



Supplementary Figure 1

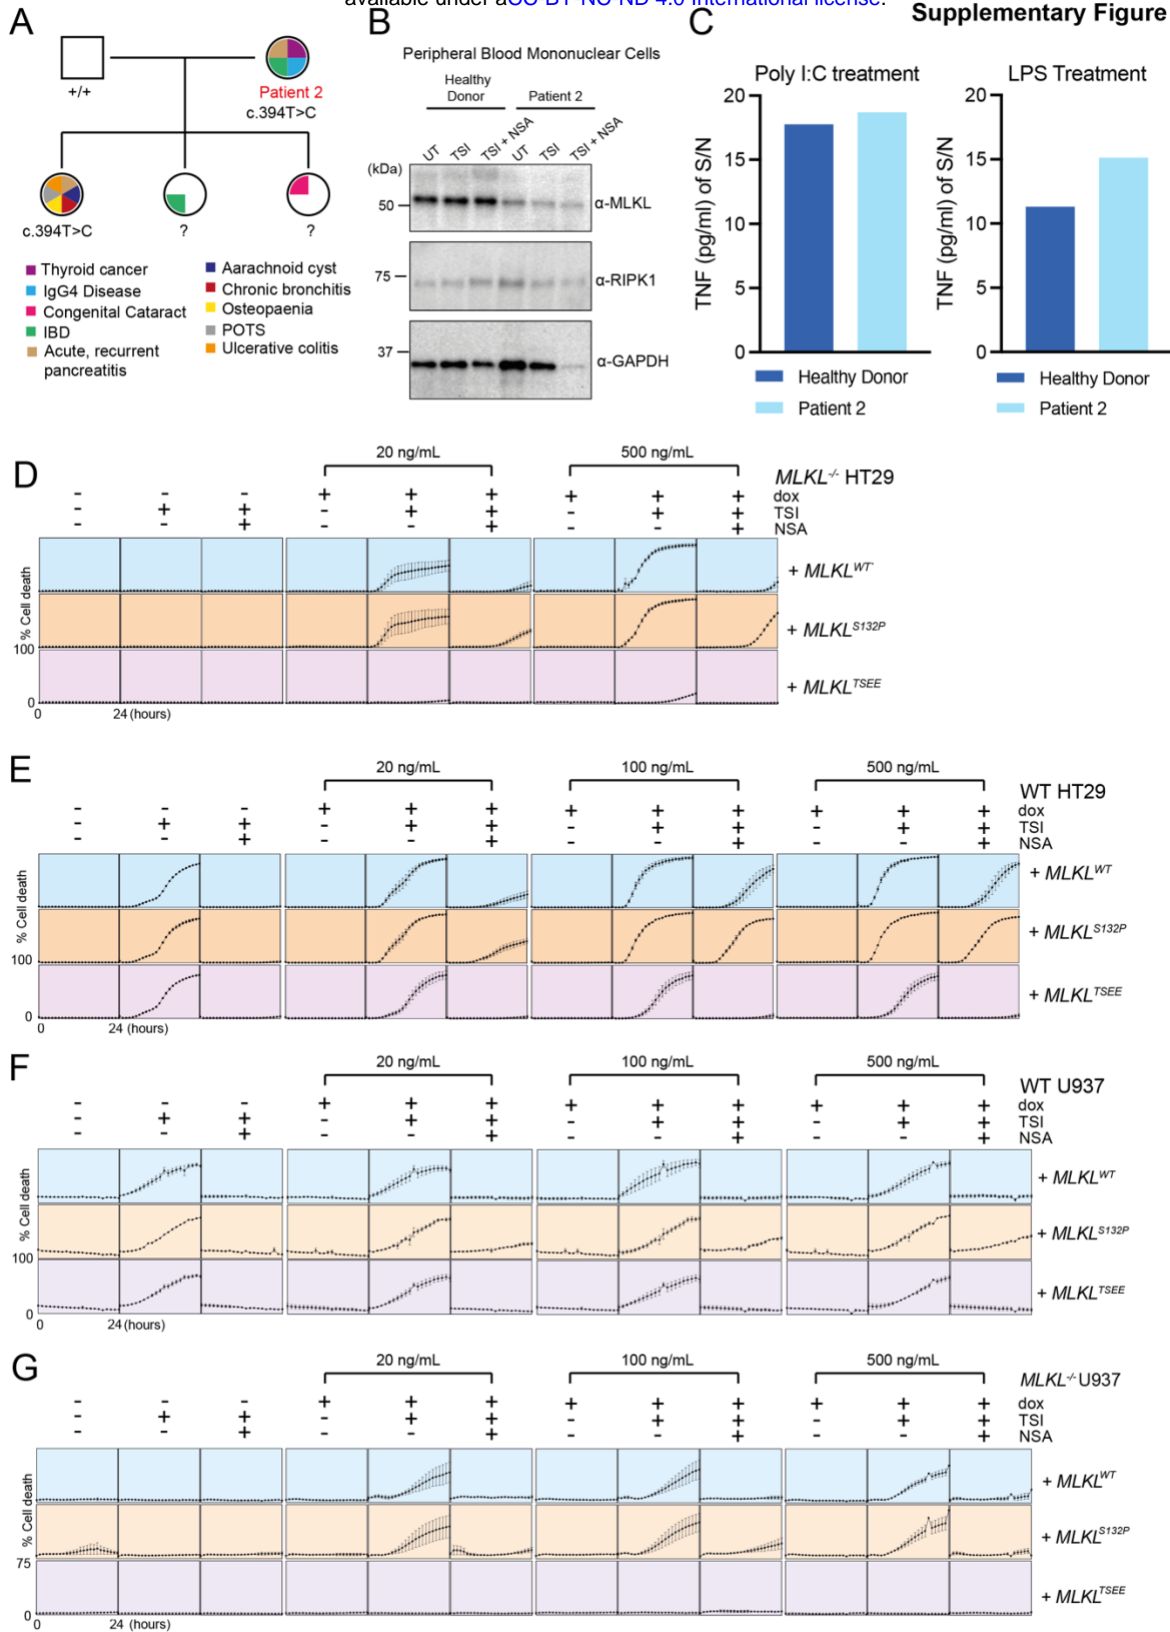

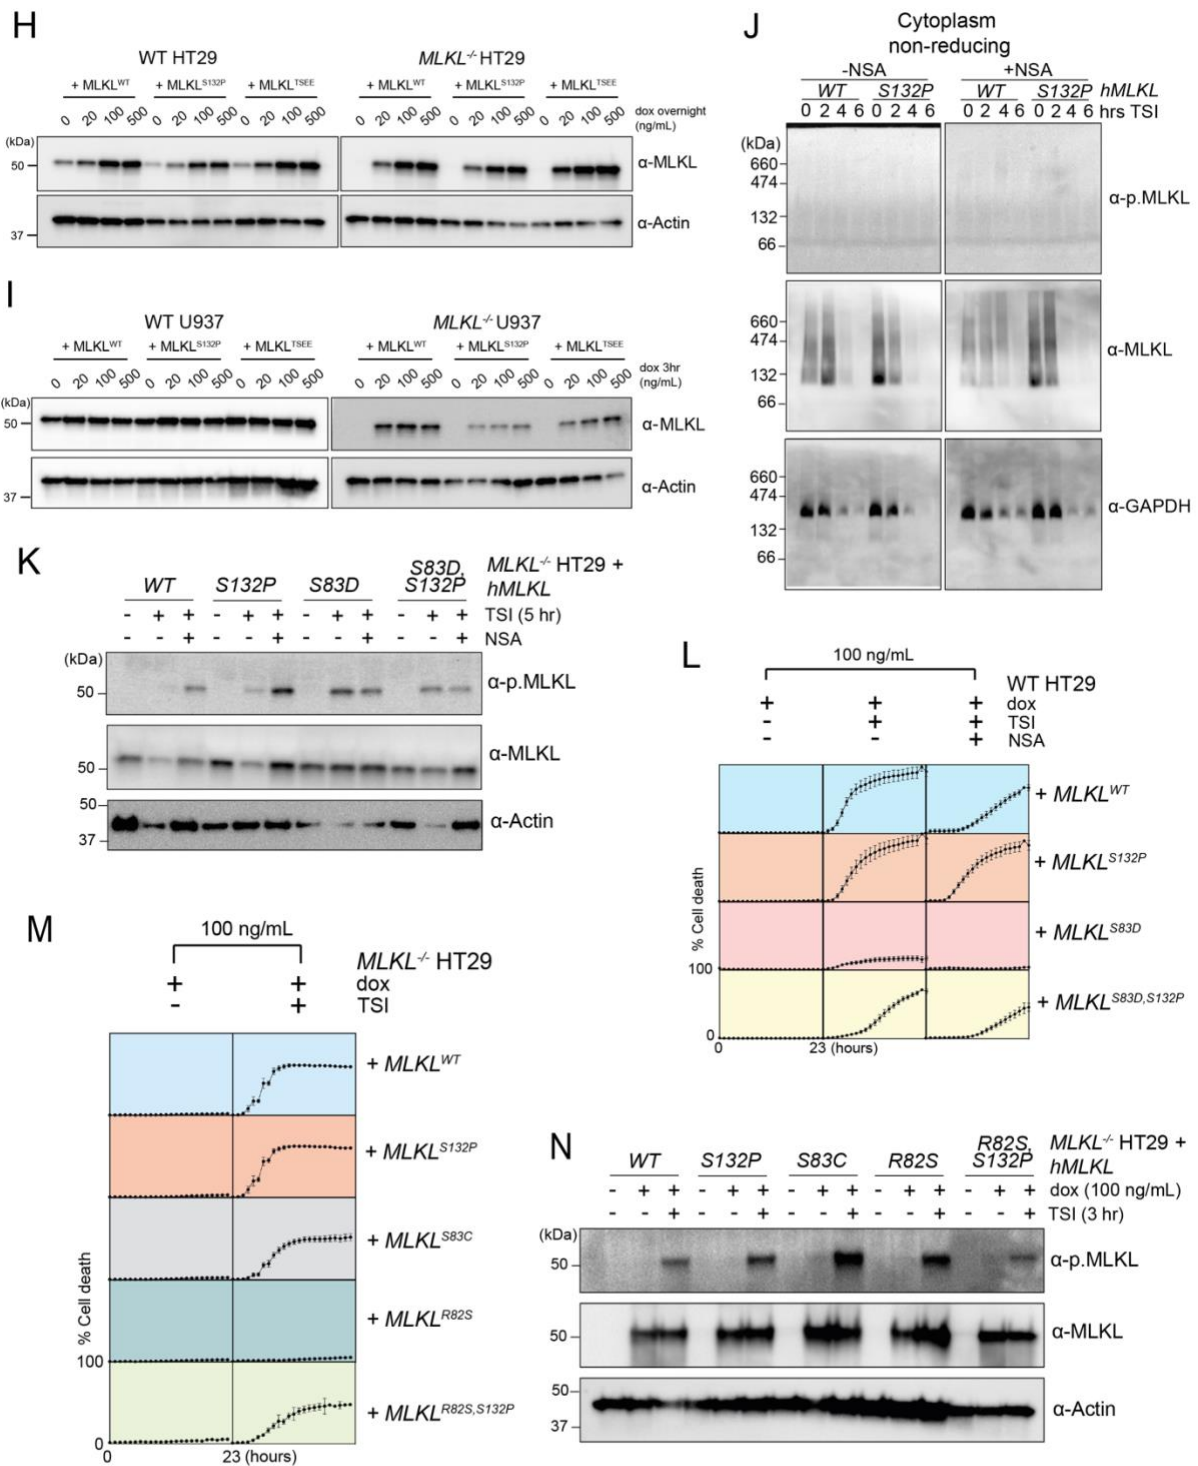

## **Supplementary Figure 2. Cells expressing endogenous MLKL<sup>S131P</sup> exhibit reduced TSI-induced necroptotic cell death.**

**(A)** Representative images of H&E staining of salivary glands, mediastinum, liver and lung from 7–9-month-old *Mkl<sup>WT/WT</sup>* and *Mkl<sup>S131P/S131P</sup>* mice. Images are representative of  $n=2$  mice per genotype. **(B-D)** ADVIA hematology quantification of circulating red blood cells **(B)**, platelets **(C)** and white blood cells **(D)** in *Mkl<sup>WT/WT</sup>*, *Mkl<sup>WT/S131P</sup>* and *Mkl<sup>S131P/S131P</sup>* mice across age. Each symbol represents one independent mouse sampled and error bars represent mean  $\pm$  SEM for  $n=12-38$  mice as indicated. **(E-S)** Flow cytometry quantification of innate (Ly6C<sup>hi</sup>, Ly6C<sup>lo</sup> and neutrophils) and adaptative (B cells, CD4<sup>+</sup> T cells and CD8<sup>+</sup> T cells) immune cells in the bone marrow **(E-I)**, spleen **(J-N)** and inguinal lymph nodes **(O-S)** of 8–12-week-old basal state *Mkl<sup>WT/WT</sup>*, *Mkl<sup>WT/S131P</sup>*, and *Mkl<sup>S131P/S131P</sup>* mice as indicated. Each symbol represents one independent mouse sampled and error bars represent mean  $\pm$  SEM for  $n=7-11$  mice as indicated. **(T, U)** GMP, MegE, CFU-E, and Pre-GM progenitor populations in adult bone marrow were gated according to previously published strategies and presented as percentage of gated progenitors (Lin<sup>-</sup>Kit<sup>+</sup>Sca1<sup>-</sup>). Data presented mean  $\pm$  SEM of  $n = 8$ , with each symbol representing an individual mouse sampled. **(V, W)** Primary mouse dermal fibroblasts (MDFs) were isolated from *Mkl<sup>WT/WT</sup>*, *Mkl<sup>WT/S131P</sup>*, and *Mkl<sup>S131P/S131P</sup>* mice and stimulated as indicated for 6 hours for western blot analysis **(V)** or 20 hours for quantification of PI-positive cells using IncuCyte S3 live cell imaging **(W)**. **(X, Y)** Bone marrow derived macrophages were isolated from *Mkl<sup>WT/WT</sup>*, *Mkl<sup>WT/S131P</sup>*, and *Mkl<sup>S131P/S131P</sup>* mice and stimulated on day 6 of culture as indicated for 6 hours for western blot analysis **(X)** or 24 hours for quantification of PI-positive cells using IncuCyte S3 live cell imaging **(Y)**. \* $p<0.05$  \*\* $p<0.01$  calculated using an unpaired, two-tailed Students t-test.

**Supplementary Figure 2**

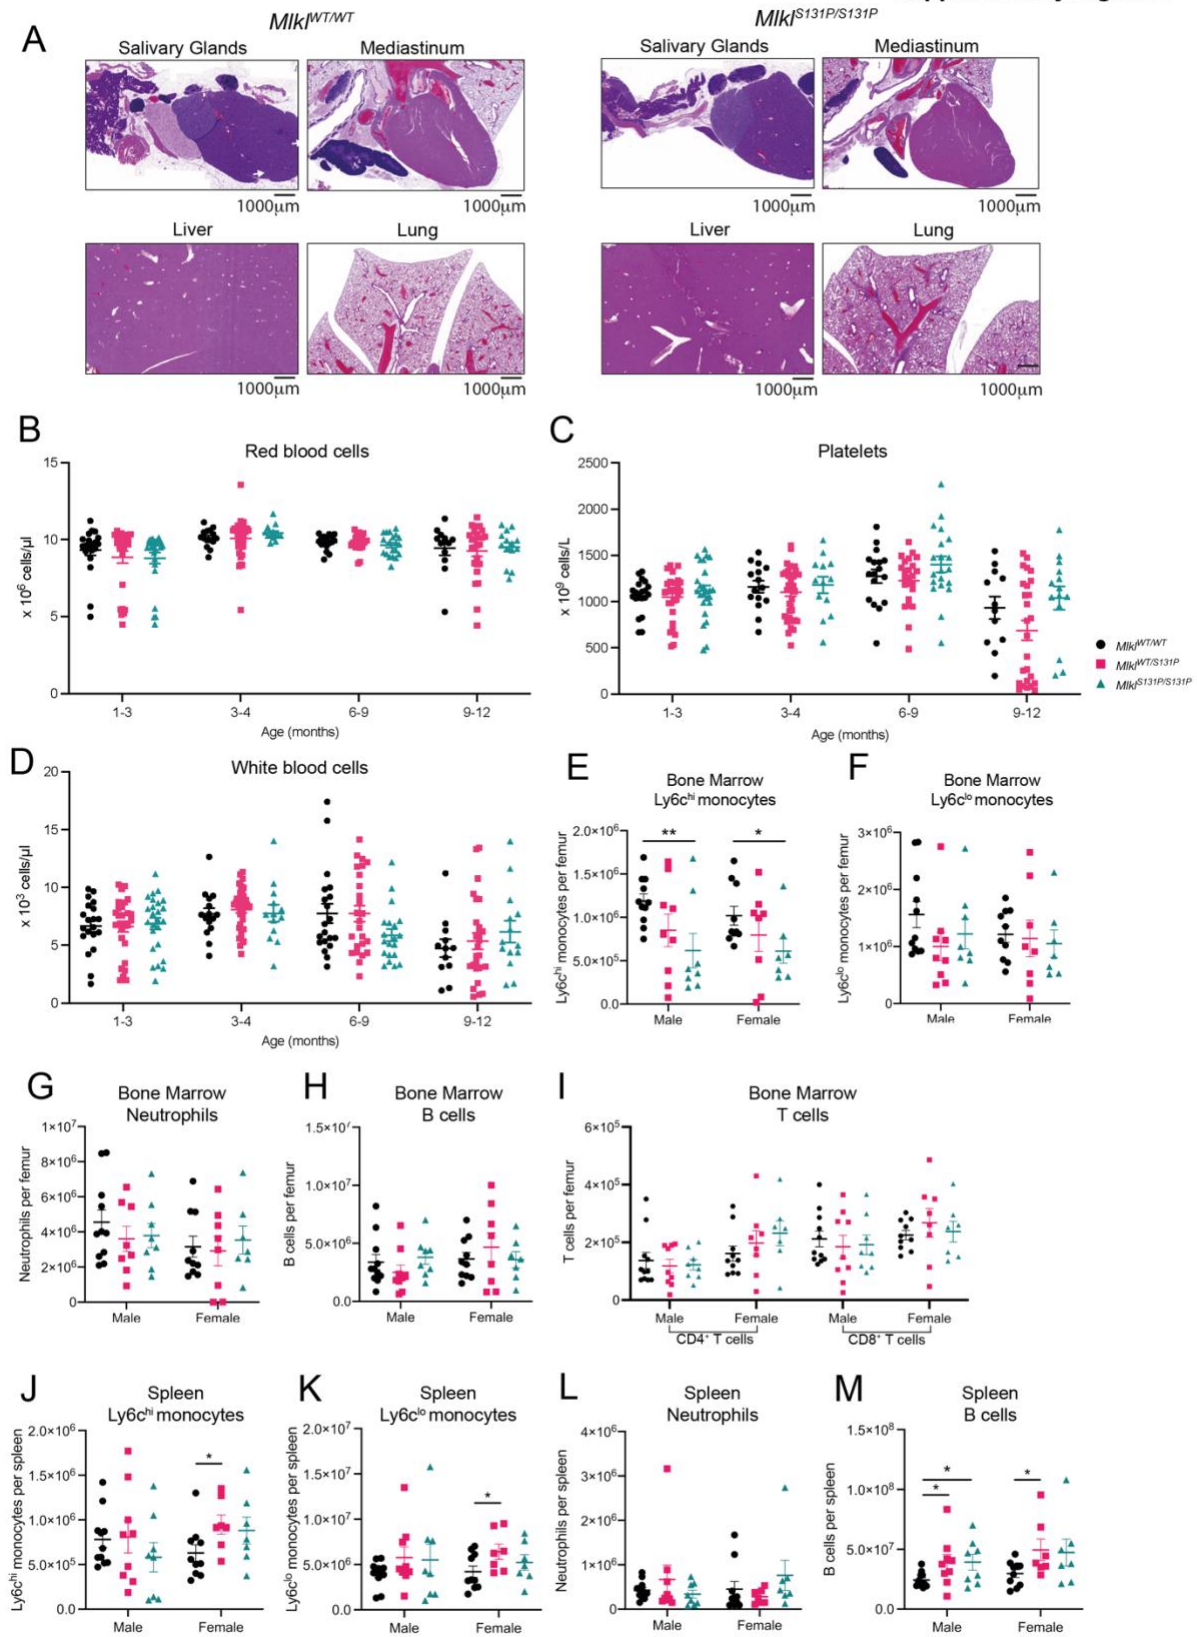

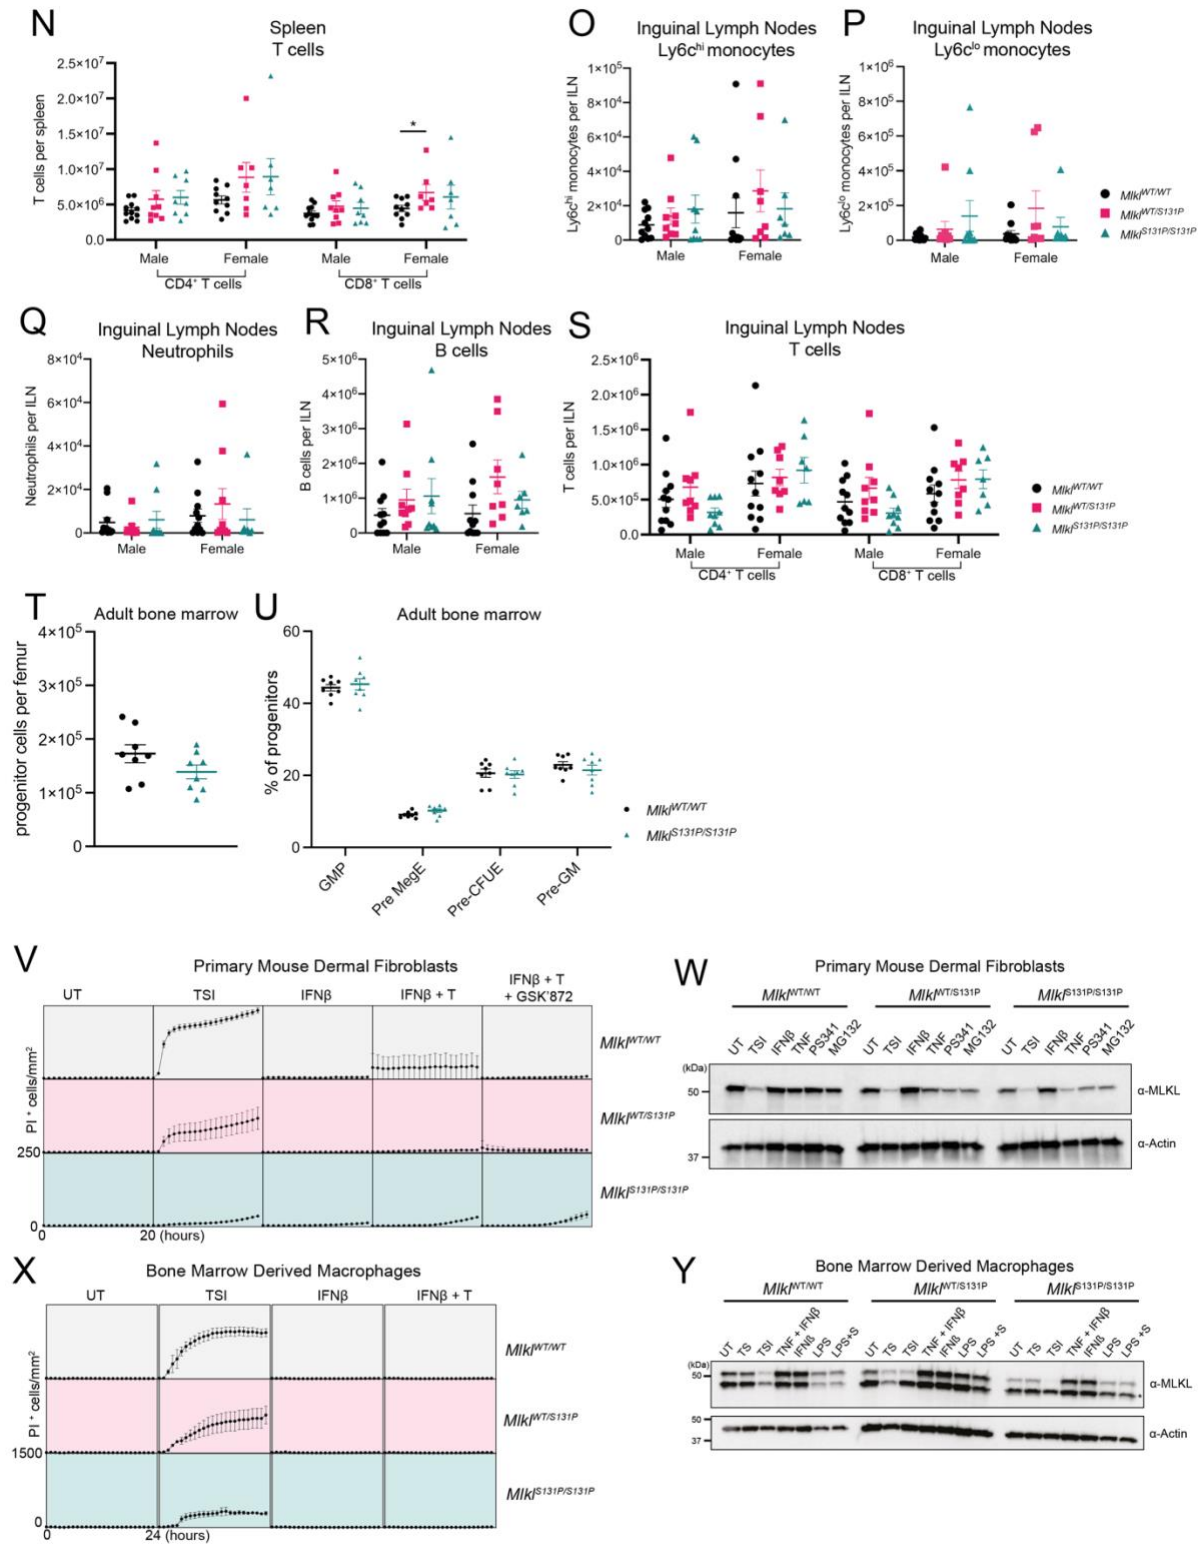

**Supplementary Figure 3. *Mikl*<sup>S131P/S131P</sup> hematopoietic stem cells transplanted in excess are outcompeted at 6-weeks post-transplant.**

White blood cells (A) and neutrophils (B) in *Mikl*<sup>WT/WT</sup>, *Mikl*<sup>WT/S131P</sup>, and *Mikl*<sup>S131P/S131P</sup> mice following treatment with 5.5 Gy radiation. Mean ± SEM of *n*=3-15 independent mice from three separate experiments. Relative amount of Annexin V (C) and ROS (D) in *Mikl*<sup>WT/S131P</sup> and *Mikl*<sup>S131P/S131P</sup> LSK and progenitor cells was determined 21 days post irradiation. MFI calculated relative to mean of *n*= 6 *Mikl*<sup>WT/WT</sup> LSK and progenitor cells. Mean ± SEM of *n*=3-4. (E) Multiplex measurement of plasma cytokine levels at 21-days post myelosuppressive radiation. Mean ± SEM of *n*=2-4. Bone marrow from *Mikl*<sup>S131P/S131P</sup> mice on CD45<sup>Ly5.2</sup> background was mixed with wild-type GFP<sup>+</sup> competitor bone marrow on a CD45<sup>Ly5.2</sup> background at a 50:50 (F, G) or 70:30 (H-J) ratio and transplanted into irradiated CD45<sup>Ly5.1</sup> recipients. Relative donor contribution to red blood cells (F, I), platelets (G, J) and PBMCs (H) was assessed at 6 weeks post-transplantation. Mean ± SEM shown of *n*=5-11, with each donor bone marrow placed into 2-3 recipients. Host contribution (CD45<sup>Ly5.1</sup>) depicted in pink, GFP competitor in green, and test (*Mikl*<sup>WT/WT</sup>, *Mikl*<sup>WT/S131P</sup>, *Mikl*<sup>S131P/S131P</sup>) in purple. \**p*<0.05 \*\**p*<0.01 calculated using an unpaired, two-tailed Students t-test.

Supplementary Figure 3

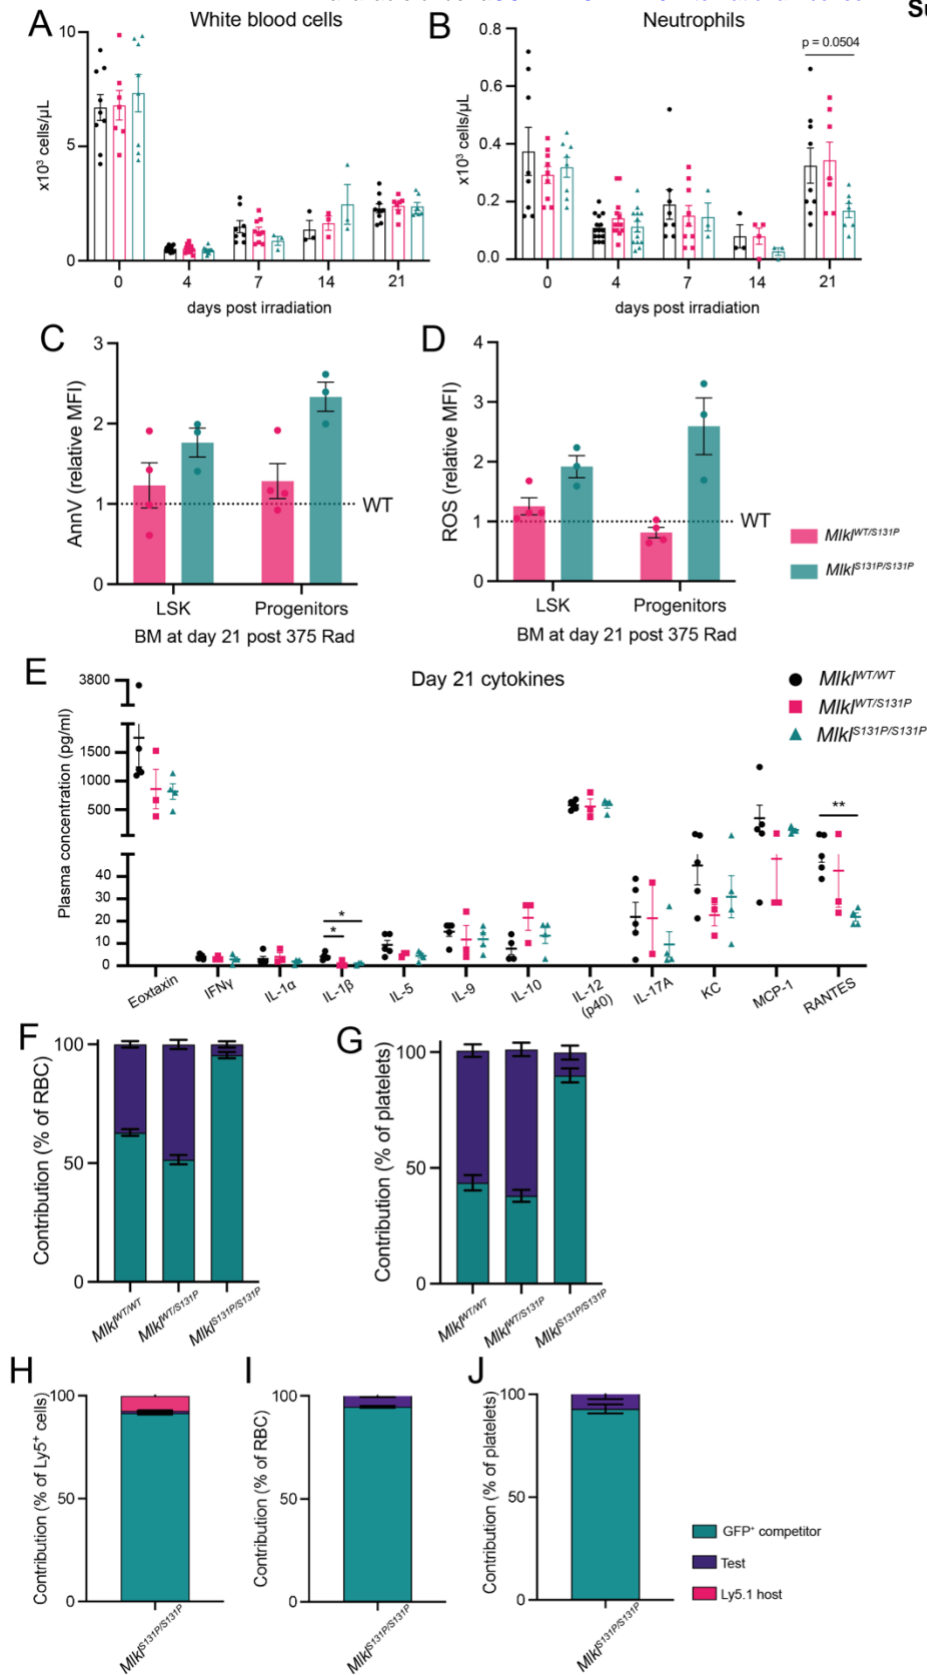

**Supplementary Figure 4. *Mkl1*<sup>hi</sup> mice have reduced levels of Ly6C<sup>hi</sup> monocytes in the peritoneal lavage at 24-hours post zymosan injection.**

(A-P) Flow cytometry quantification of peritoneal innate (macrophages, Ly6C<sup>hi</sup>, Ly6C<sup>lo</sup> and neutrophils) and adaptive (CD4<sup>+</sup> T cells, CD8<sup>+</sup> T cells and B cells) immune cells at 4- (A-H) or 24- (I-P) hours post-intraperitoneal injection of zymosan as indicated. (Q-V) ADVIA hematology quantification of peripheral blood cells (lymphocytes, neutrophils, and monocytes) at 4- (Q-S) and 24- (T-V) post-injection of zymosan. (W-Y) Multiplex measurement of cytokine levels in peritoneal lavage at 4 (W, X) or 24 (Y) hours post-zymosan injection. Each symbol represents one independent animal, with mice from the 4- or 24-hour timepoint pooled from 3 and 2 independent zymosan experiments respectively. Error bars represent mean  $\pm$  SEM for  $n=2-14$  mice as indicated. (Z) Evaluation of spontaneous apoptosis in neutrophils recruited and isolated from the peritoneum 4 hours post-zymosan injection. Neutrophils were left unstimulated (spontaneous apoptosis) for 16 hours and cell death was measured every hour by percentage of SYTOX Green positive cells quantified using IncuCyte SX5 live cell imaging. Data were collected from one independent experiment with male and female data pooled, neutrophils isolated from independent mice with mean  $\pm$  SEM of  $n=6-14$  presented. \* $p<0.05$  \*\* $p<0.01$ , \*\*\* $p<0.001$  calculated using an unpaired, two-tailed Students t-test.



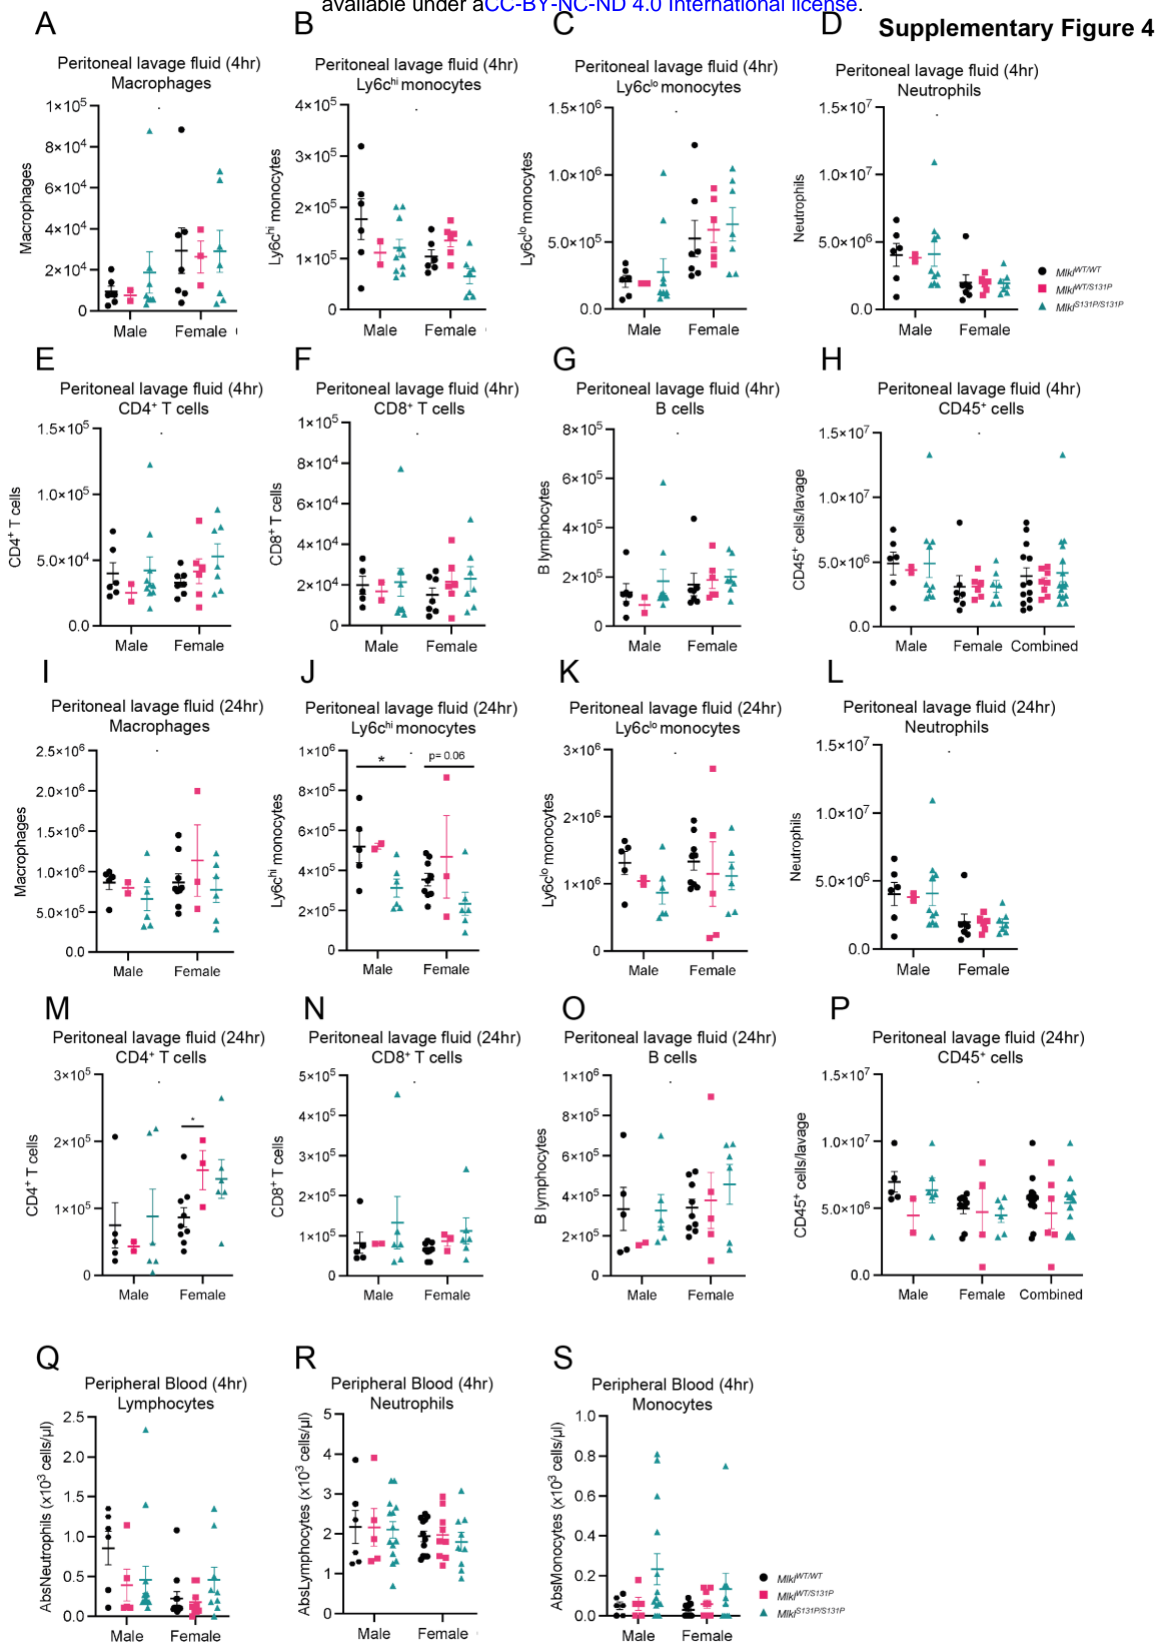

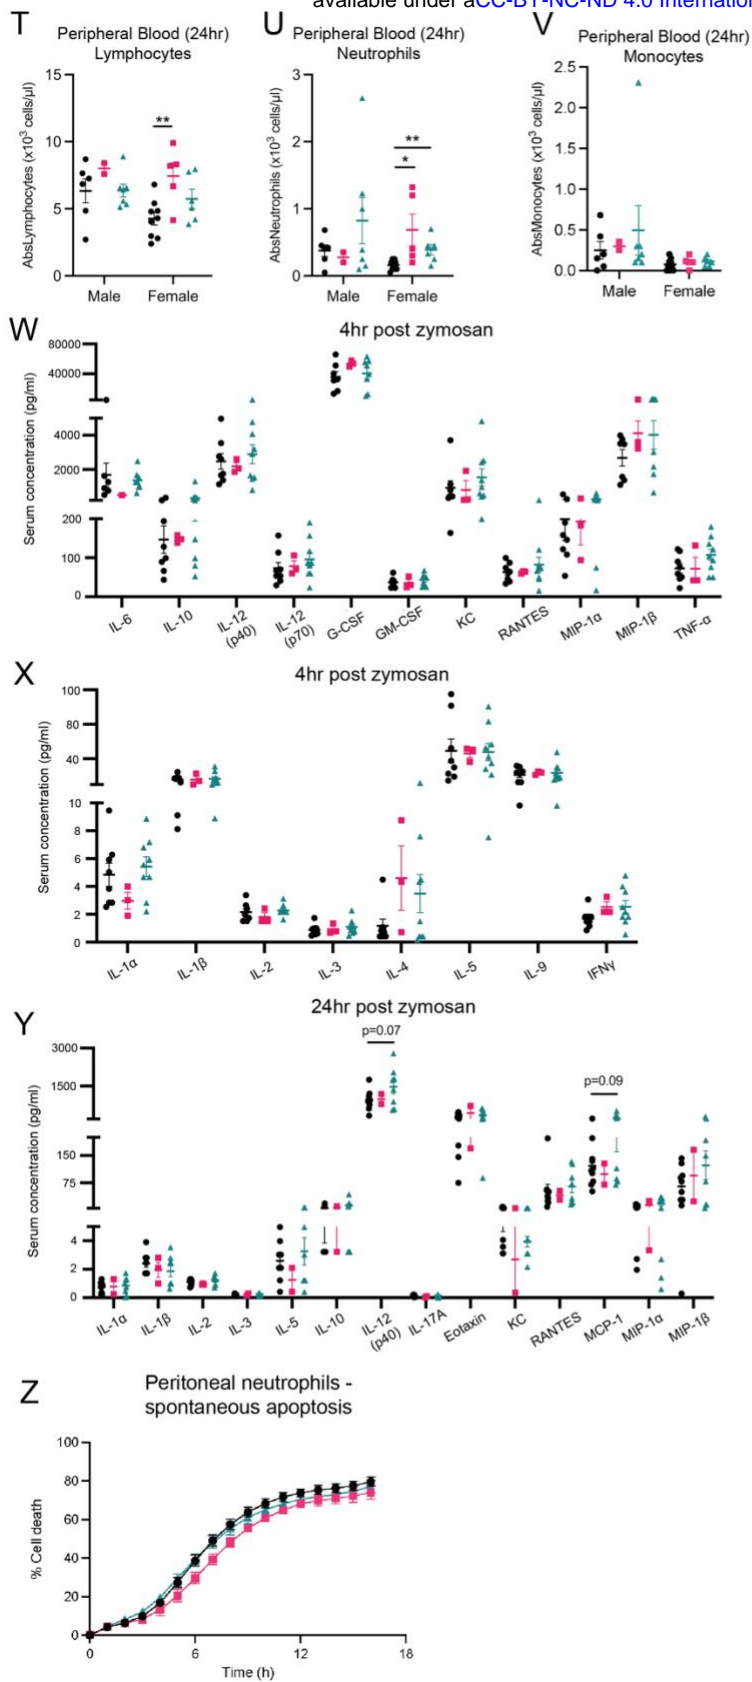

## Supplementary Figure 5. *Mik1* does not abrogate death of BMDMs upon *in vitro*

### *Salmonella* infection.

(A, B) *Mik1*<sup>WT/WT</sup>, *Mik1*<sup>WT/S131P</sup>, and *Mik1*<sup>S131P/S131P</sup> mice were infected with *Salmonella* via oral gavage and monitored for 14-days by daily body weight (A) and temperature (B) measurements. (C-E) Bacterial burden calculation of *Salmonella* colonization in the spleen (C), liver (D), and feces (E) at experimental endpoint. (F-H) ADVIA hematology quantification of peripheral monocytes (F), lymphocytes (G) and neutrophils (H). (I-O) Splenic adaptive (CD4<sup>+</sup> T cells, CD8<sup>+</sup> T cells and B cells) (I-K) and innate (macrophages, Ly6C<sup>hi</sup>, Ly6C<sup>lo</sup> and neutrophils) (L-O) immune cells were quantified by flow cytometry at experimental endpoint. *Salmonella* infection was completed 3 independent times, with each symbol representing an individual mouse sampled. Error bars represent mean ± SEM for *n*=3-9 mice as indicated. (P, Q) *In vitro* assessment of *Salmonella* SL1344 infection of primary BMDMs generated from *Mik1*<sup>WT/WT</sup>, *Mik1*<sup>WT/S131P</sup>, and *Mik1*<sup>S131P/S131P</sup> mice. (G) BMDMs were infected with *Salmonella* (MOI:25) and cleavage associated with Gasdermin-D activation during pyroptosis was analyzed by immunoblotting at the indicated time points. (H) LDH release cell death assay of BMDMs after infection with *Salmonella* (MOI:10 or MOI:50) at indicated time points. *In vitro Salmonella* experiment completed once, with mean ± SEM for *n*=3 individual mice shown. Blot images in (G) are representative of independent duplicates.

Supplementary Figure 5

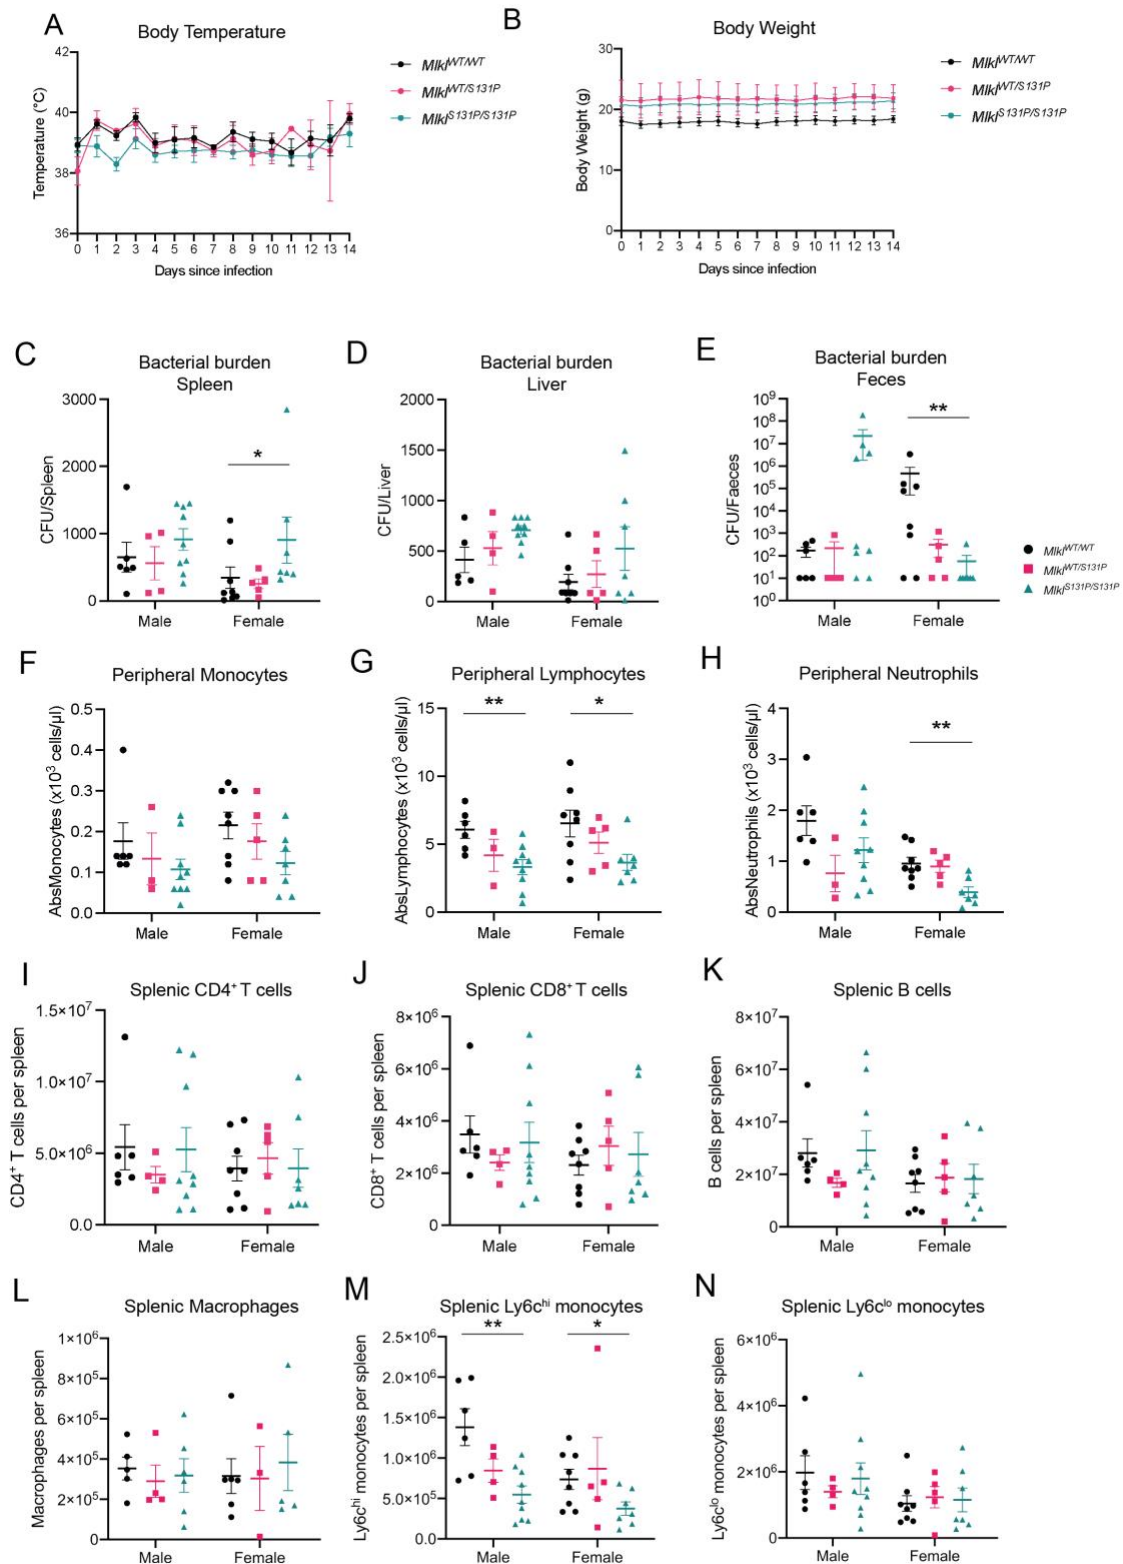

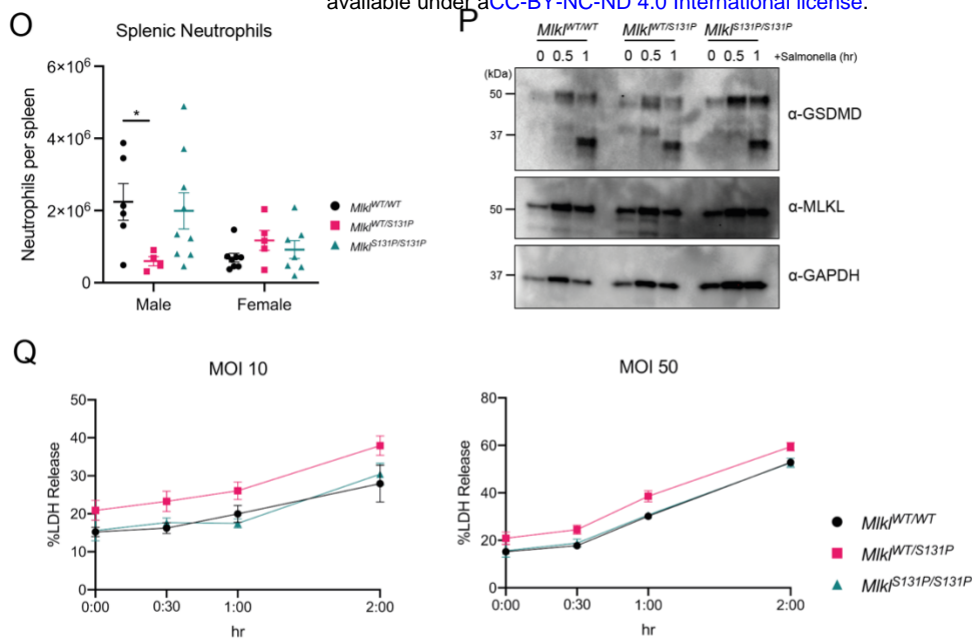

Source: https://www.biorxiv.org/content/10.1101/2022.09.08.507056v2.full.pdf
